# Supplementary material for: An Isochore Framework Underlies Chromatin Architecture
Source: PubMed Central journal article supplement (PMC5218411; doi:10.1371/journal.pone.0168023), 2017-01-06
Supplement: pone.0168023.s002.pdf [file pone.0168023.s002.pdf]

Fig. S1A

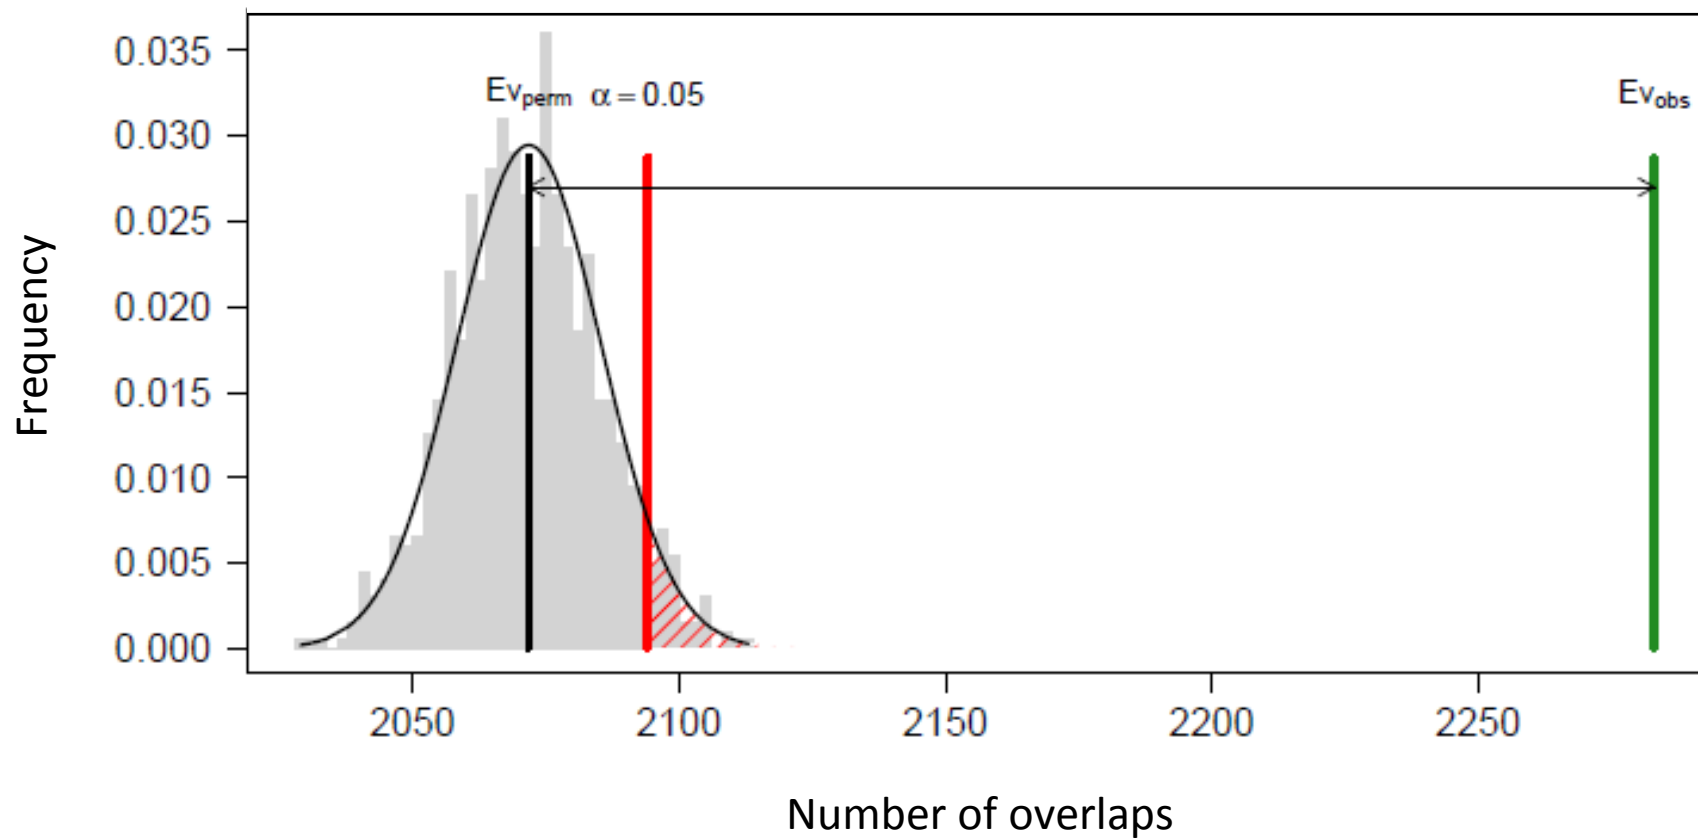

Fig. S1B

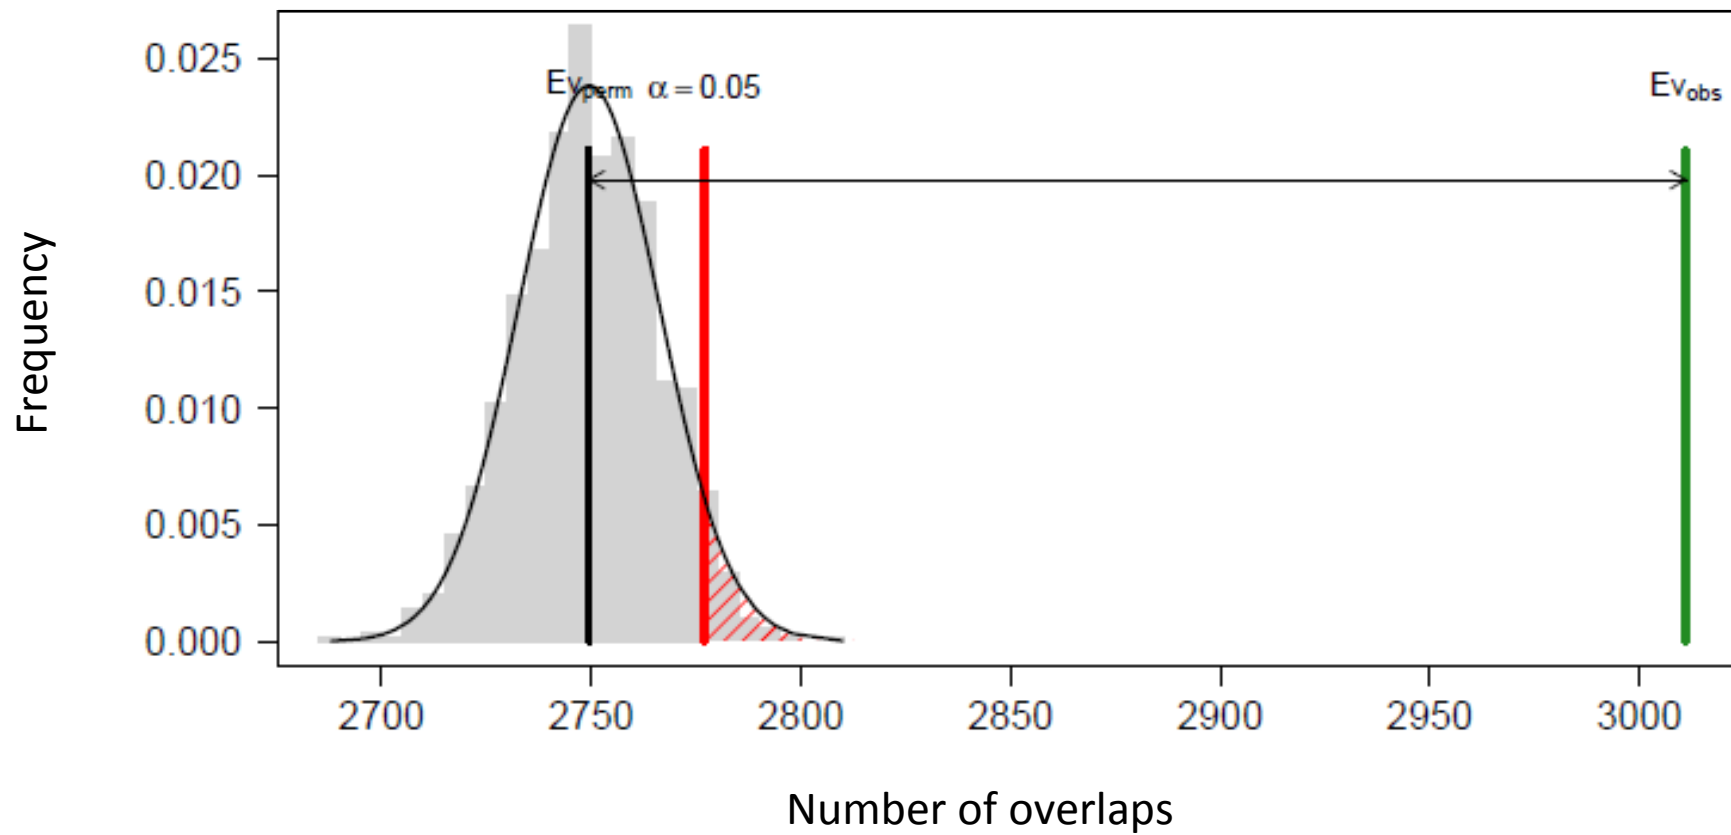



Fig. S1C

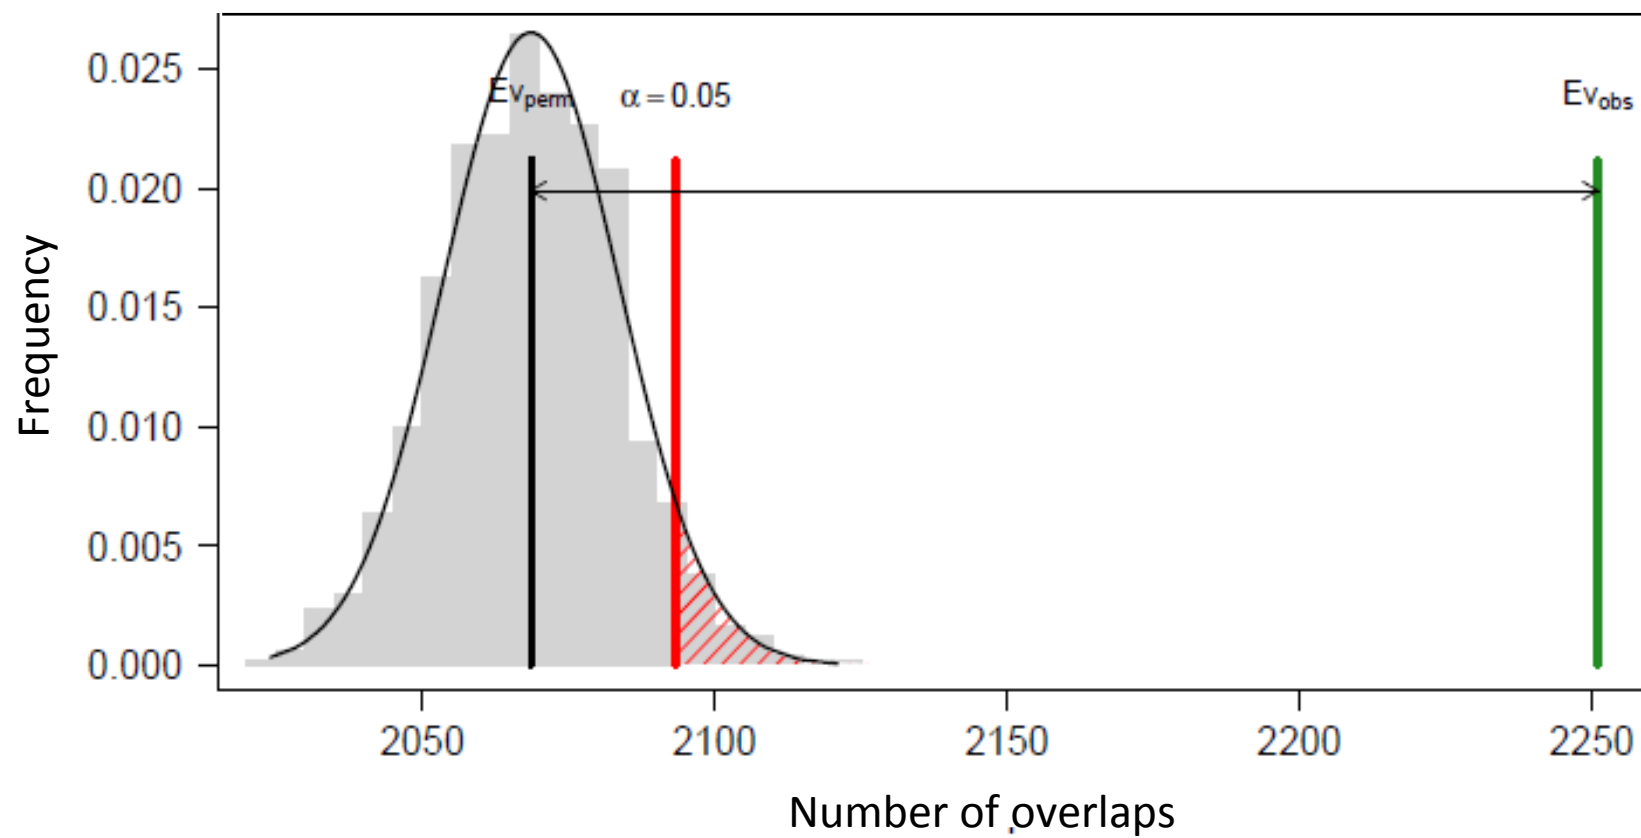

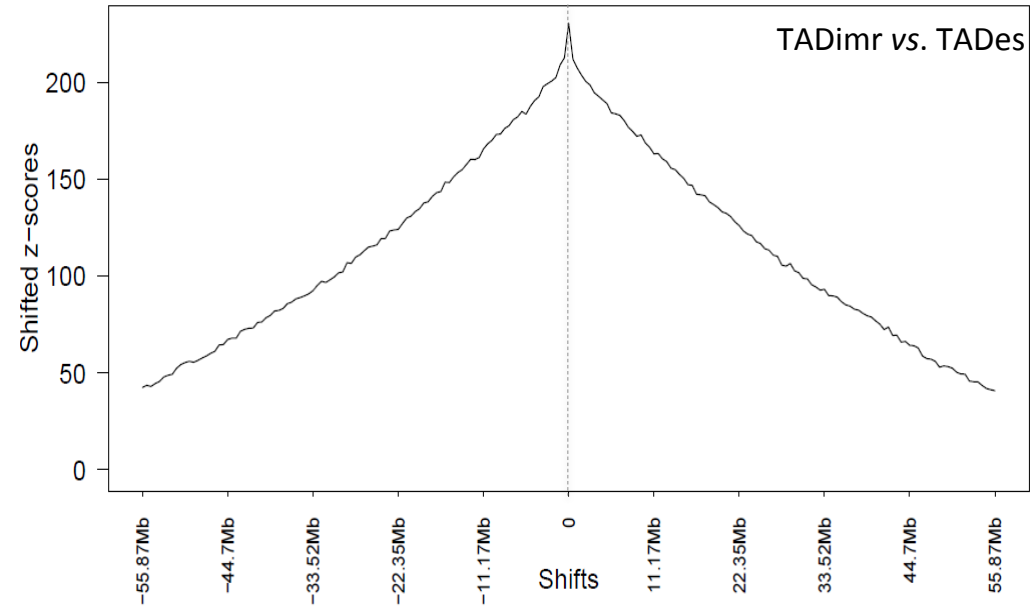

(A)

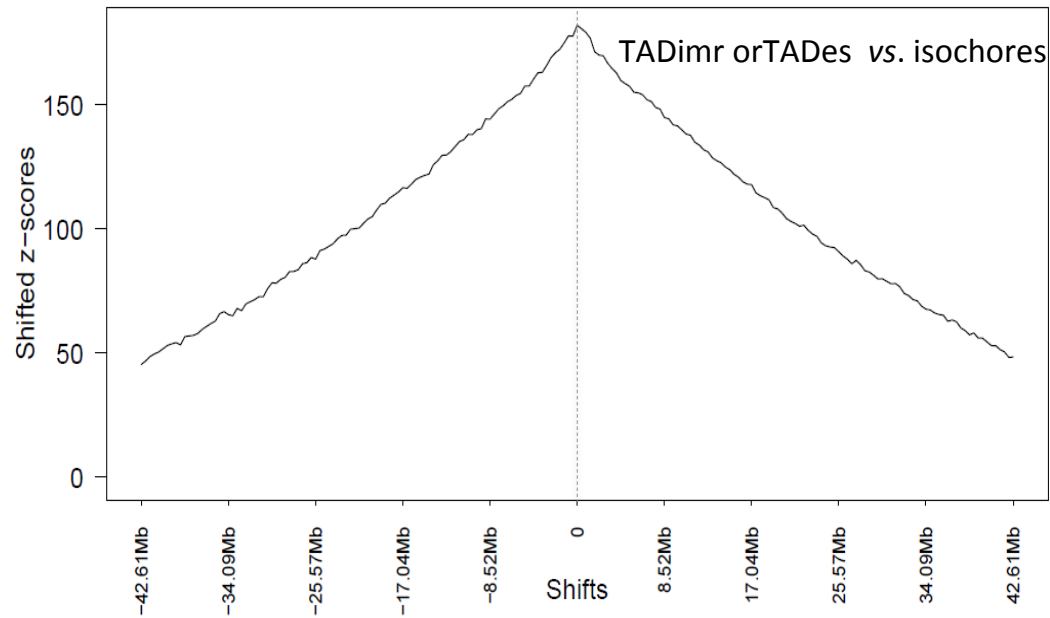

(B)

Fig. S2

**Fig. S3**

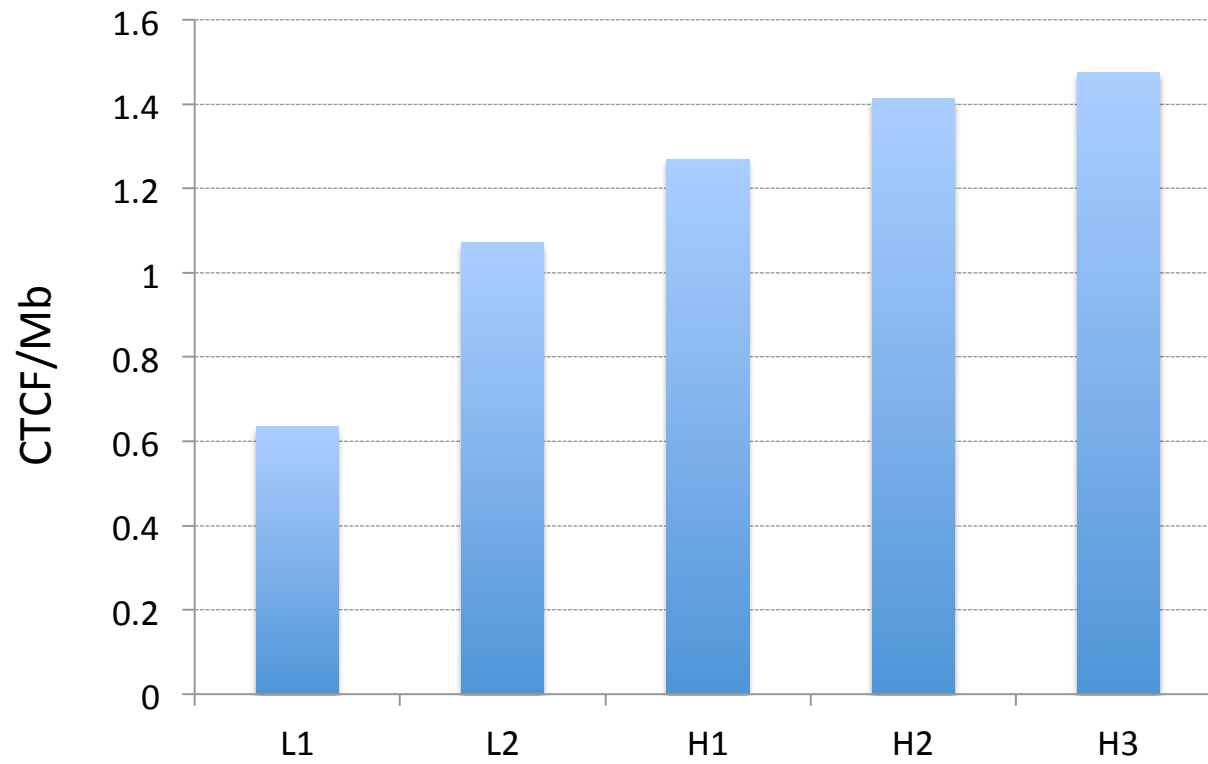

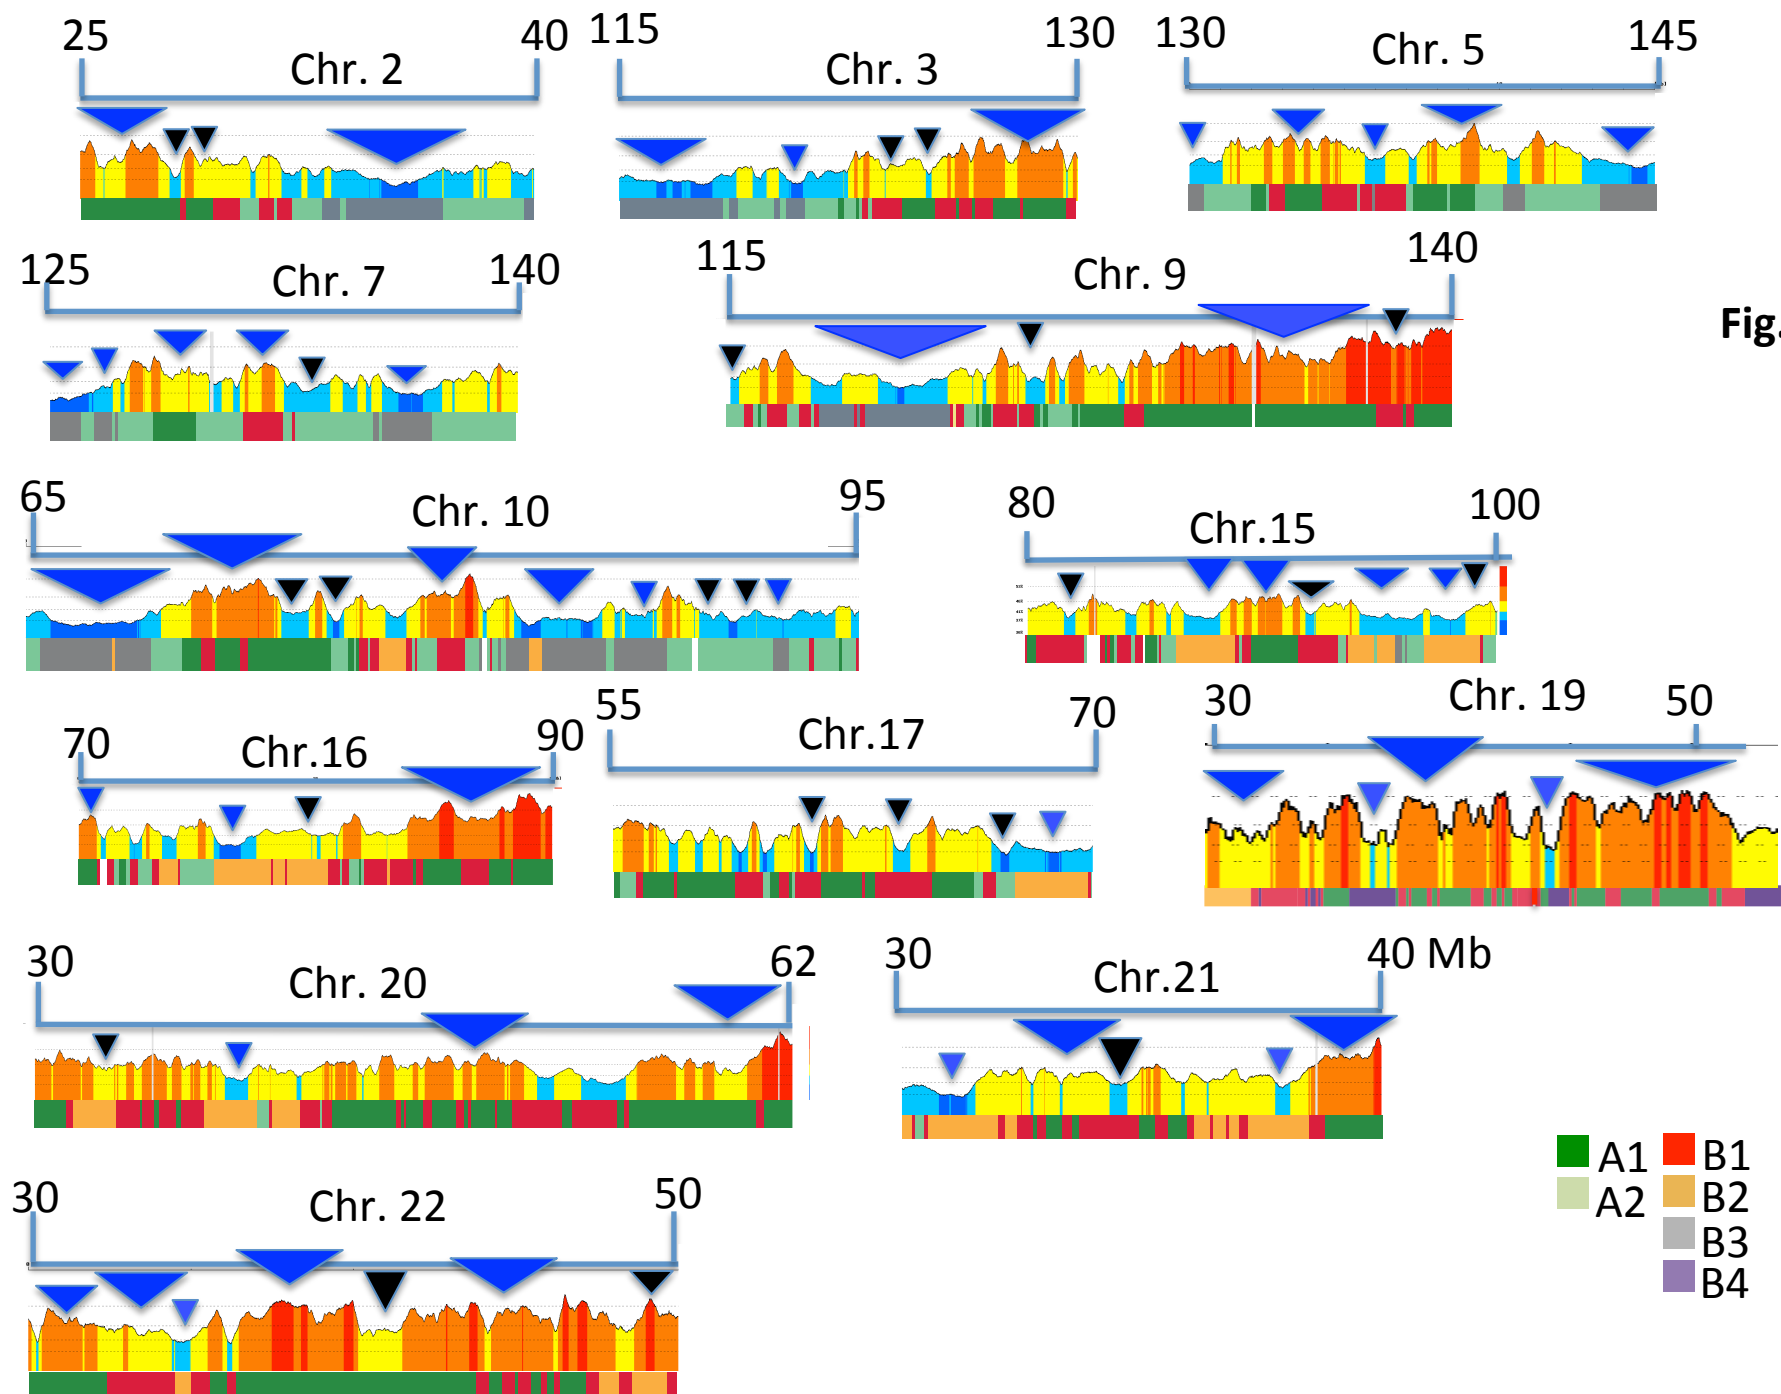

**Fig. S4**

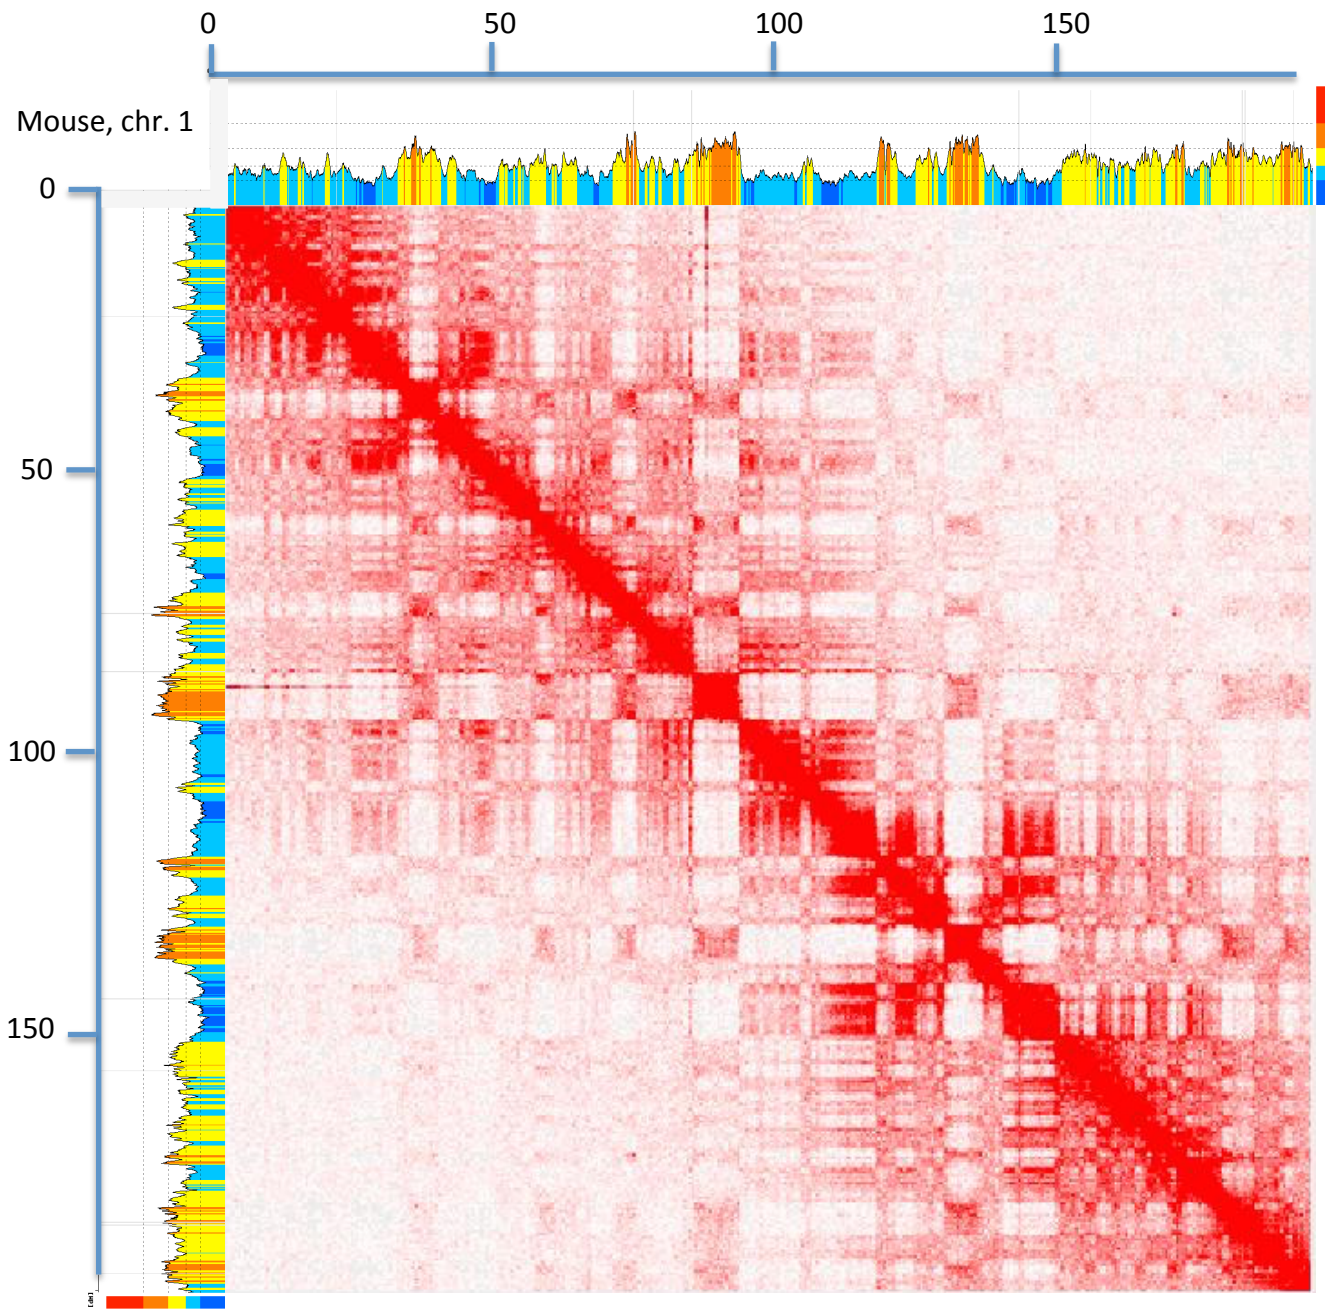

Fig. S5

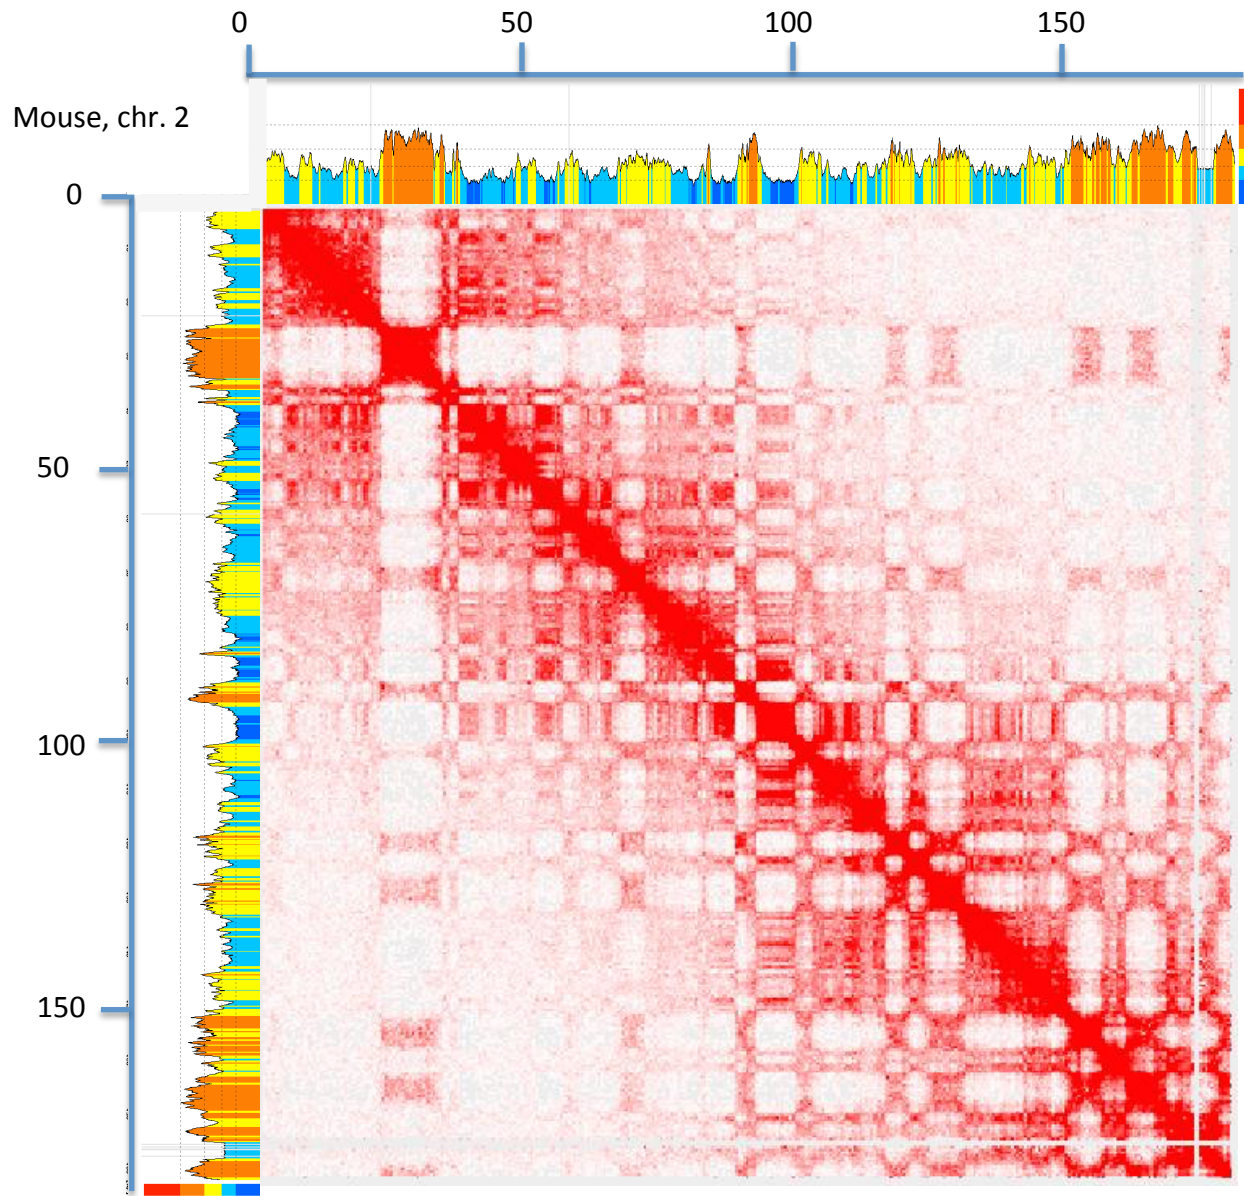

**Fig. S6**



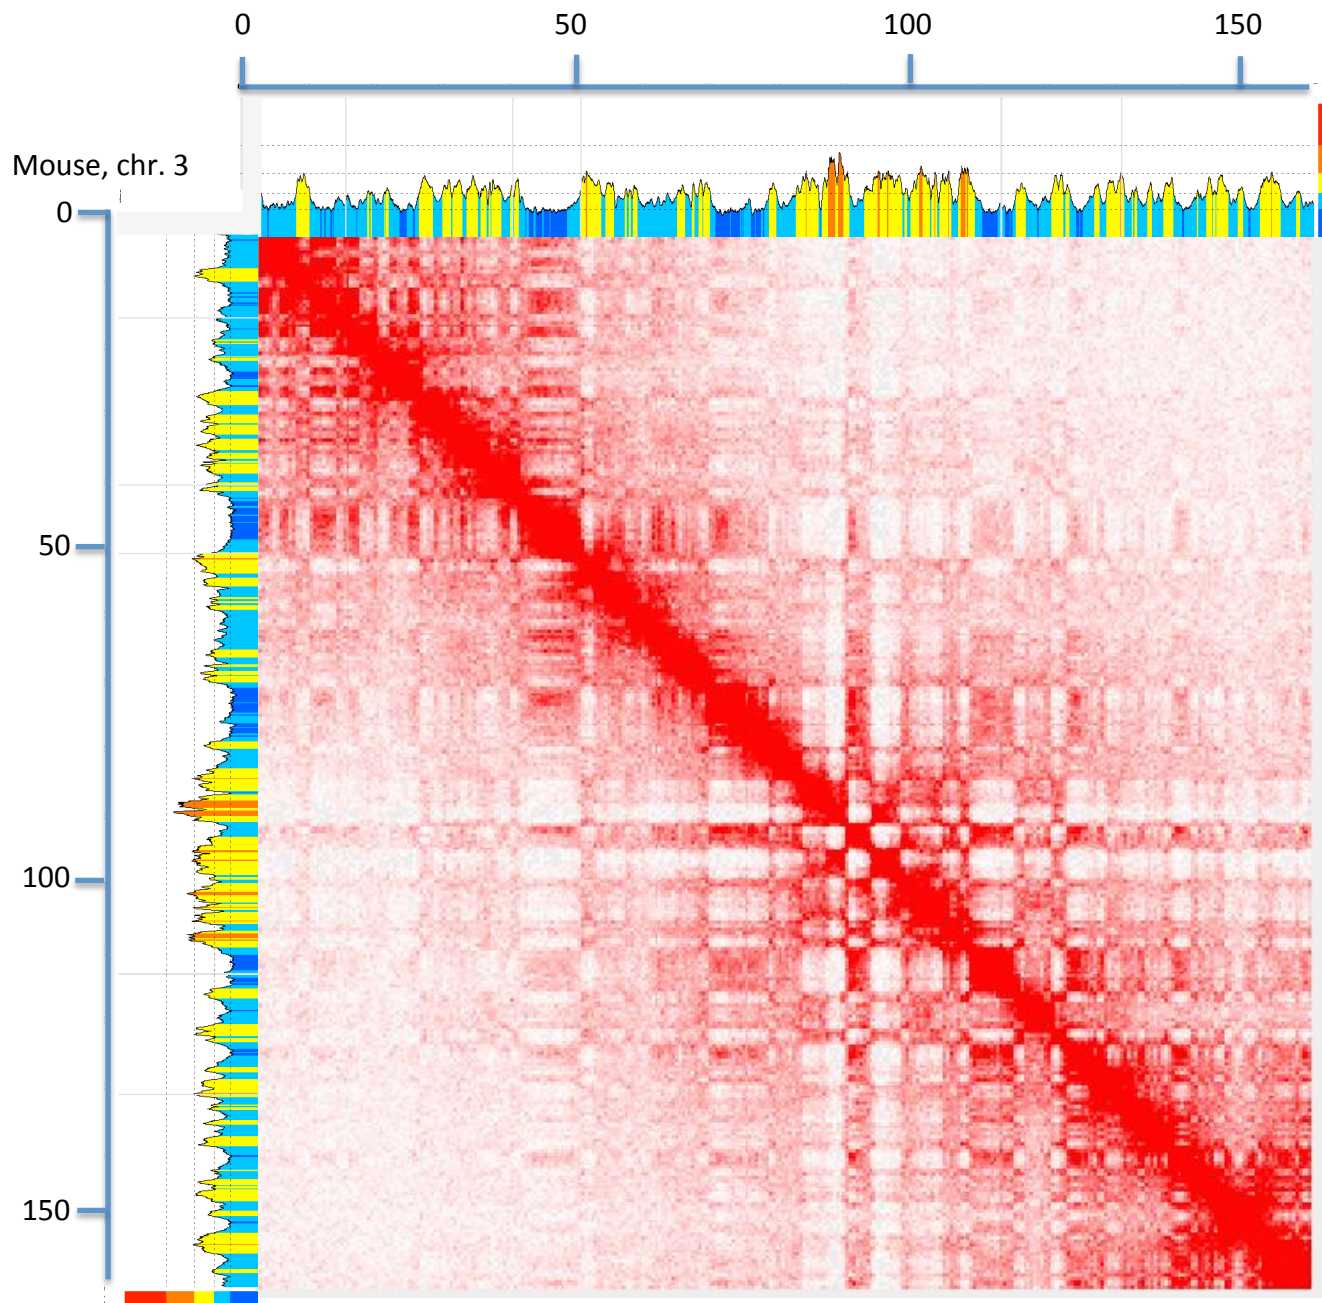

**Fig. S7**

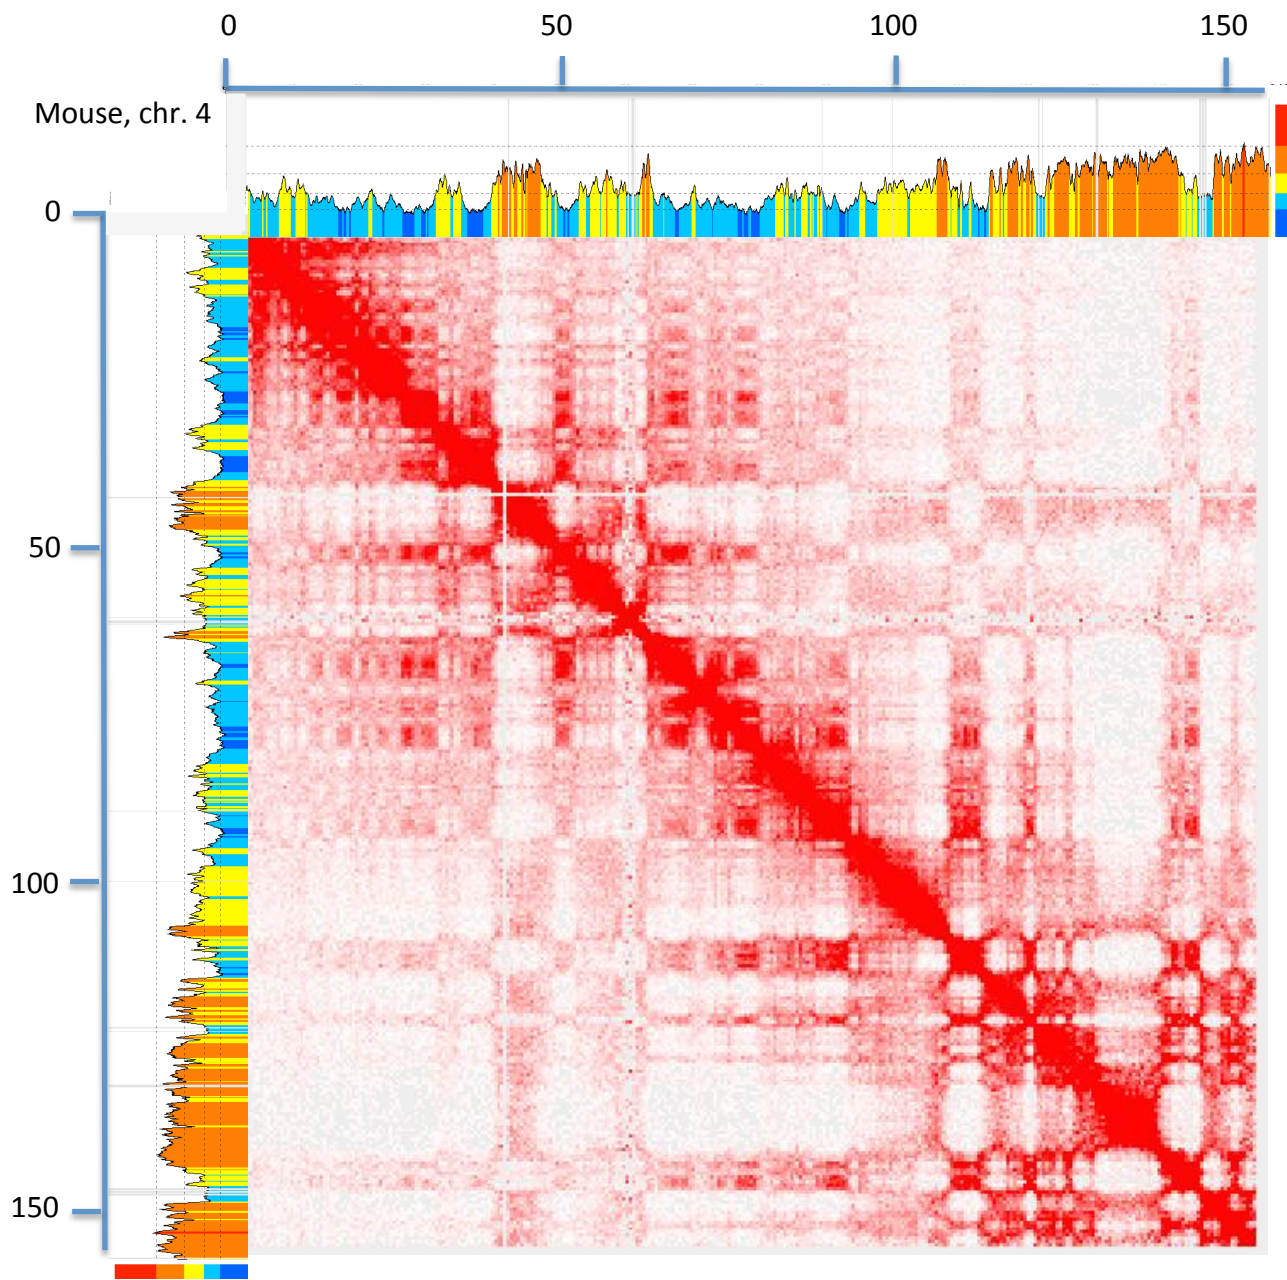

**Fig. S8**



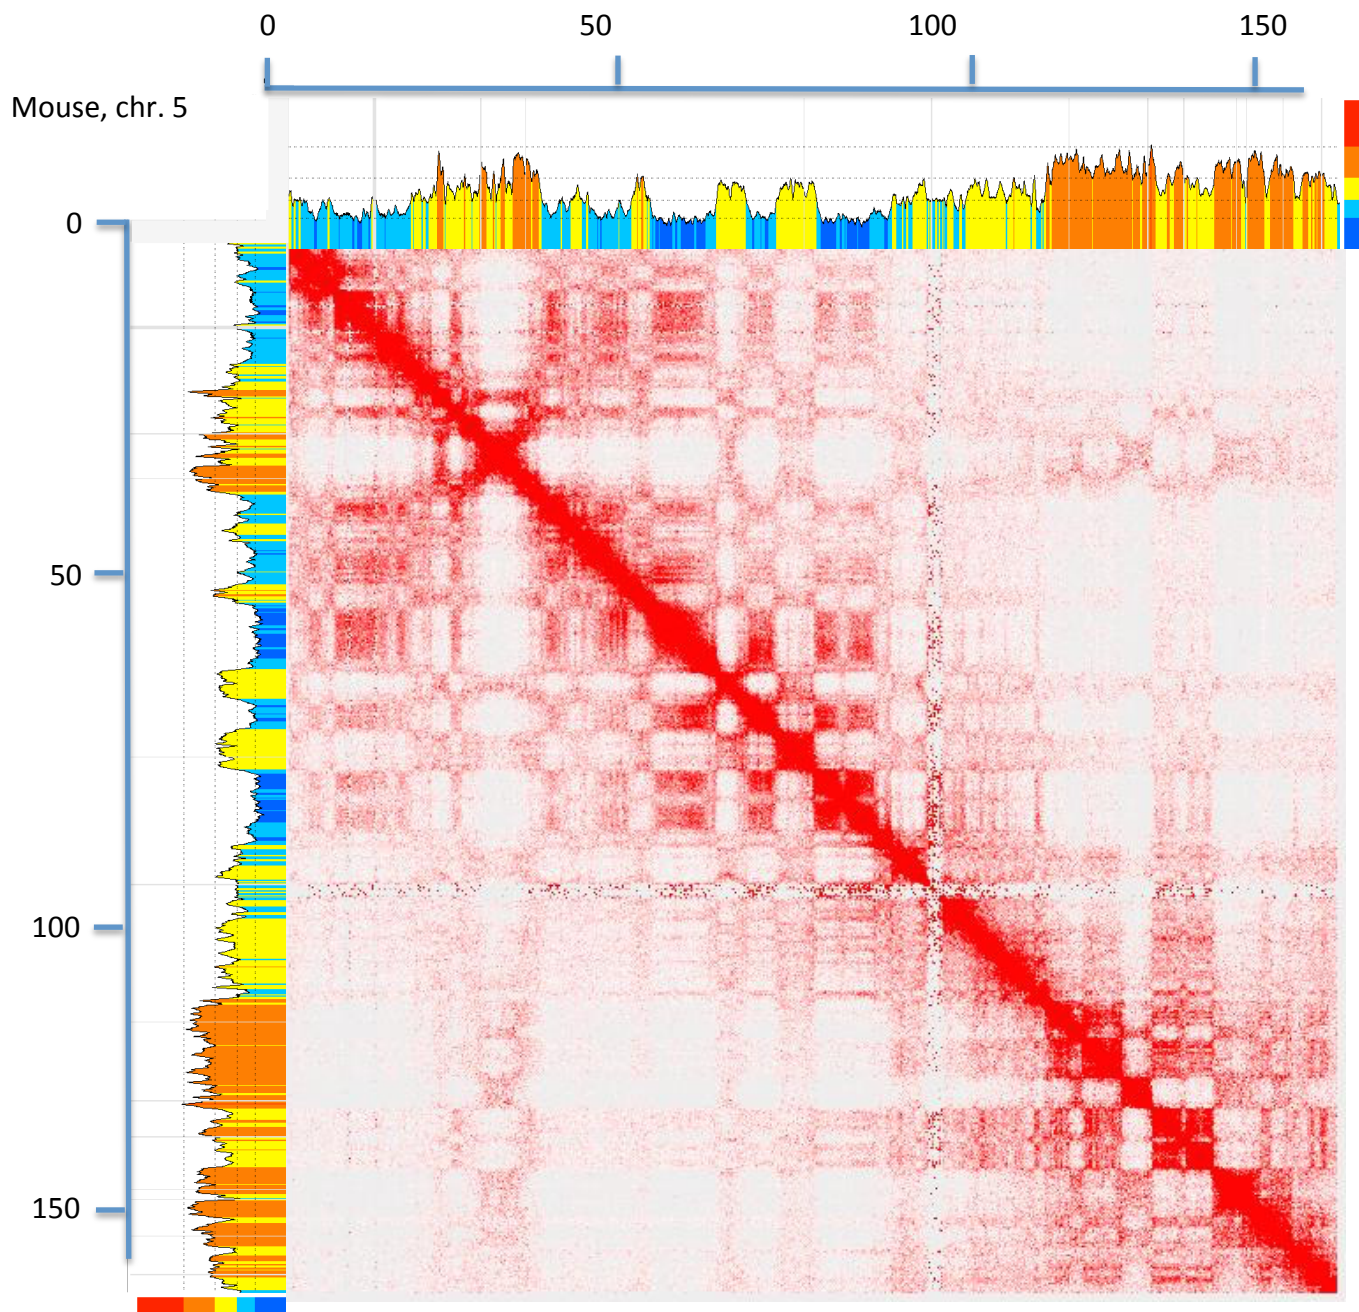

**Fig. S9**

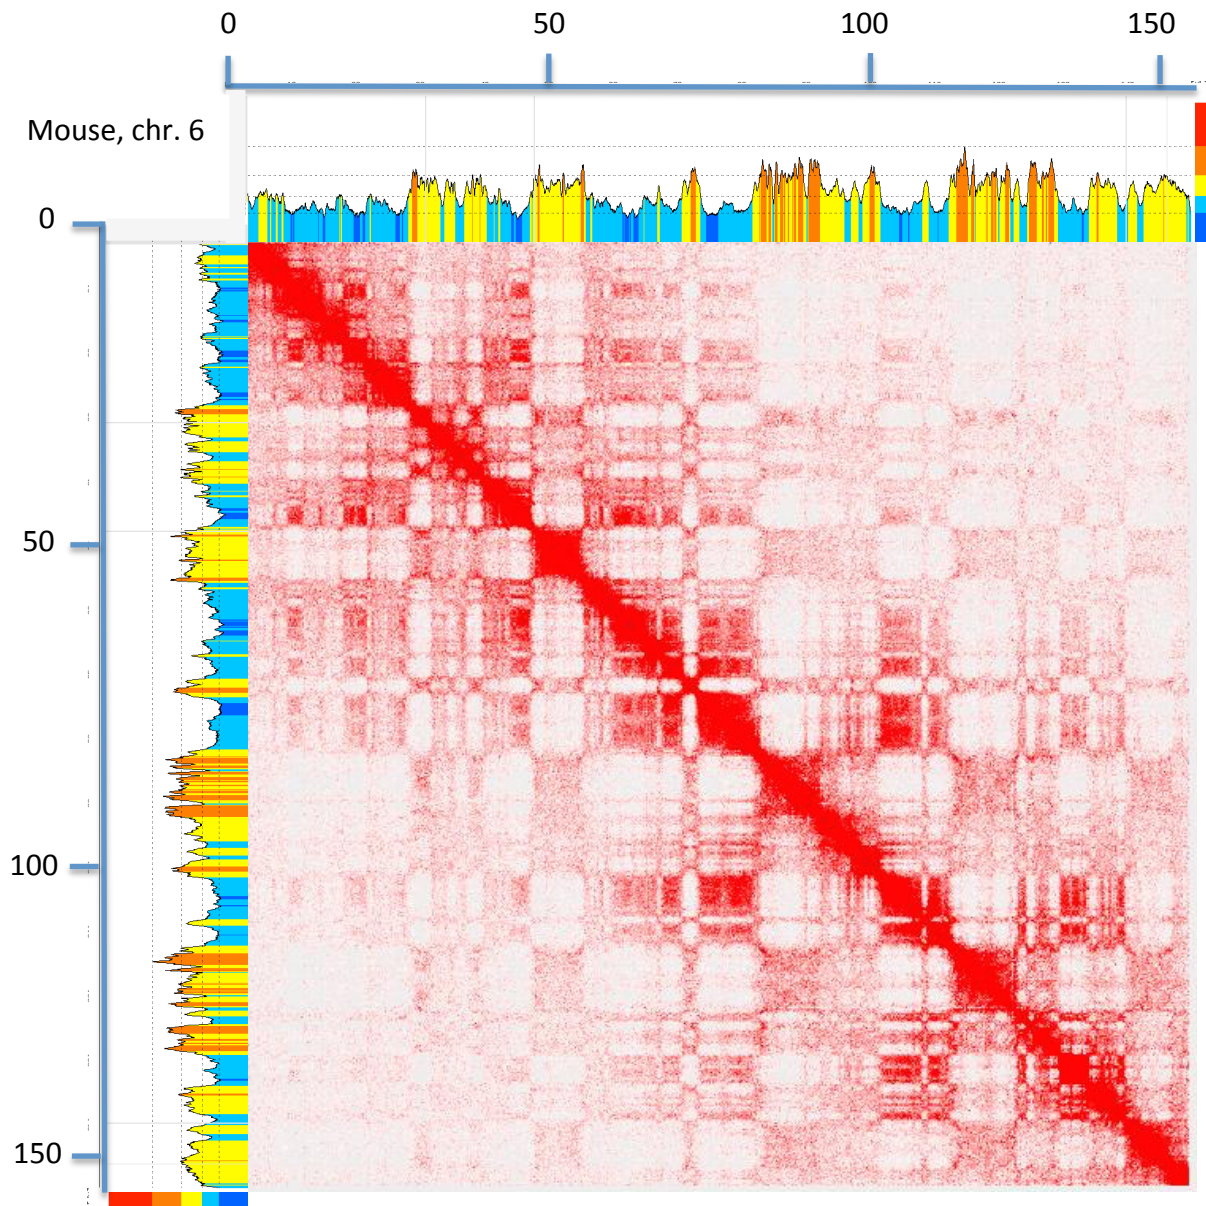

**Fig. S10**



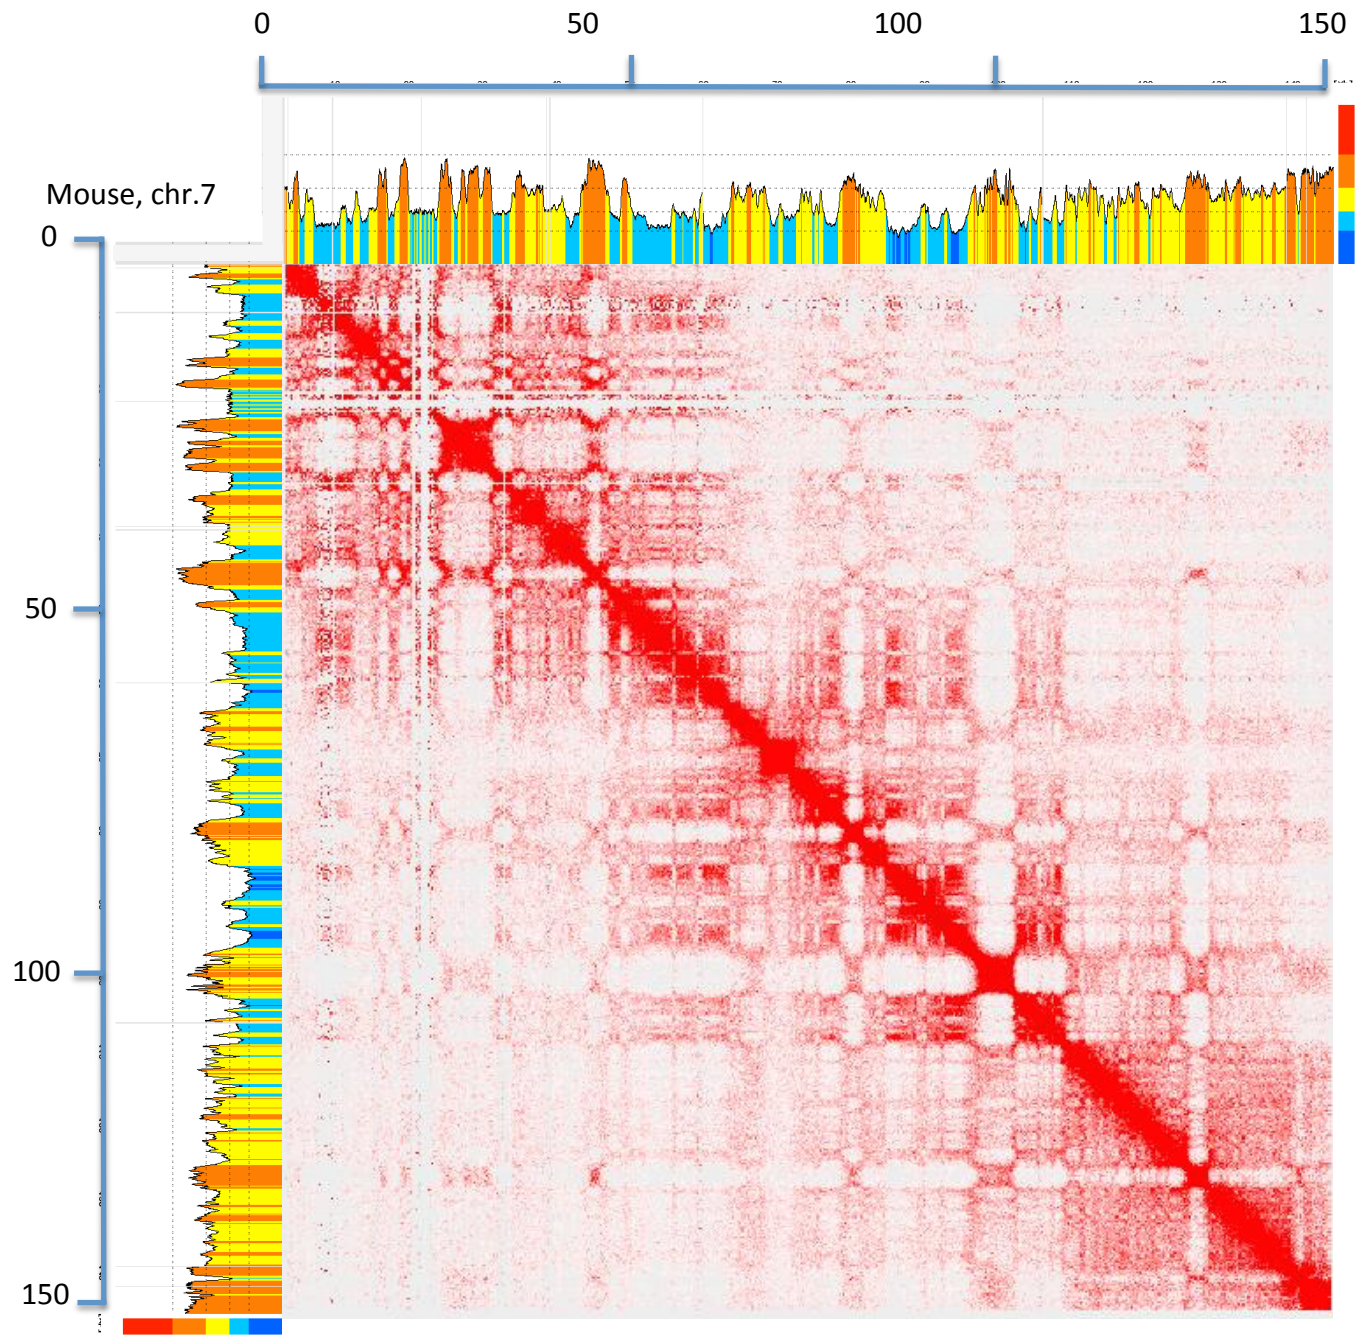

**Fig. S11**

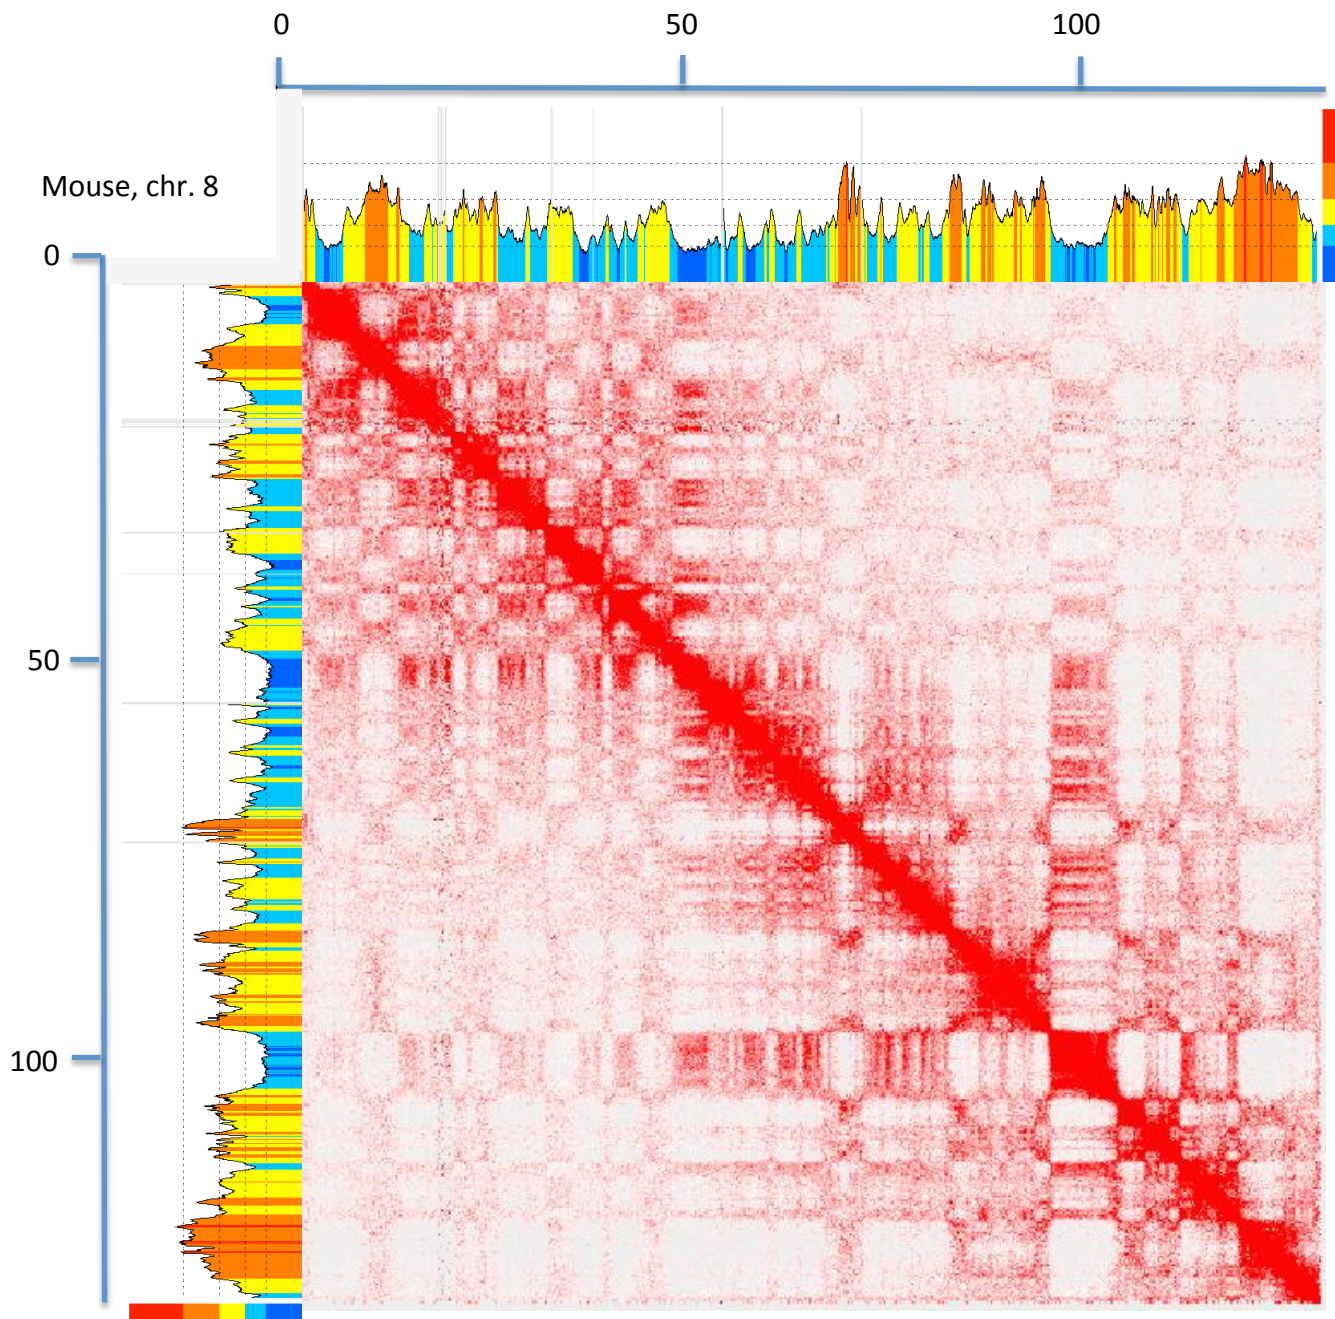

**Fig. S12**



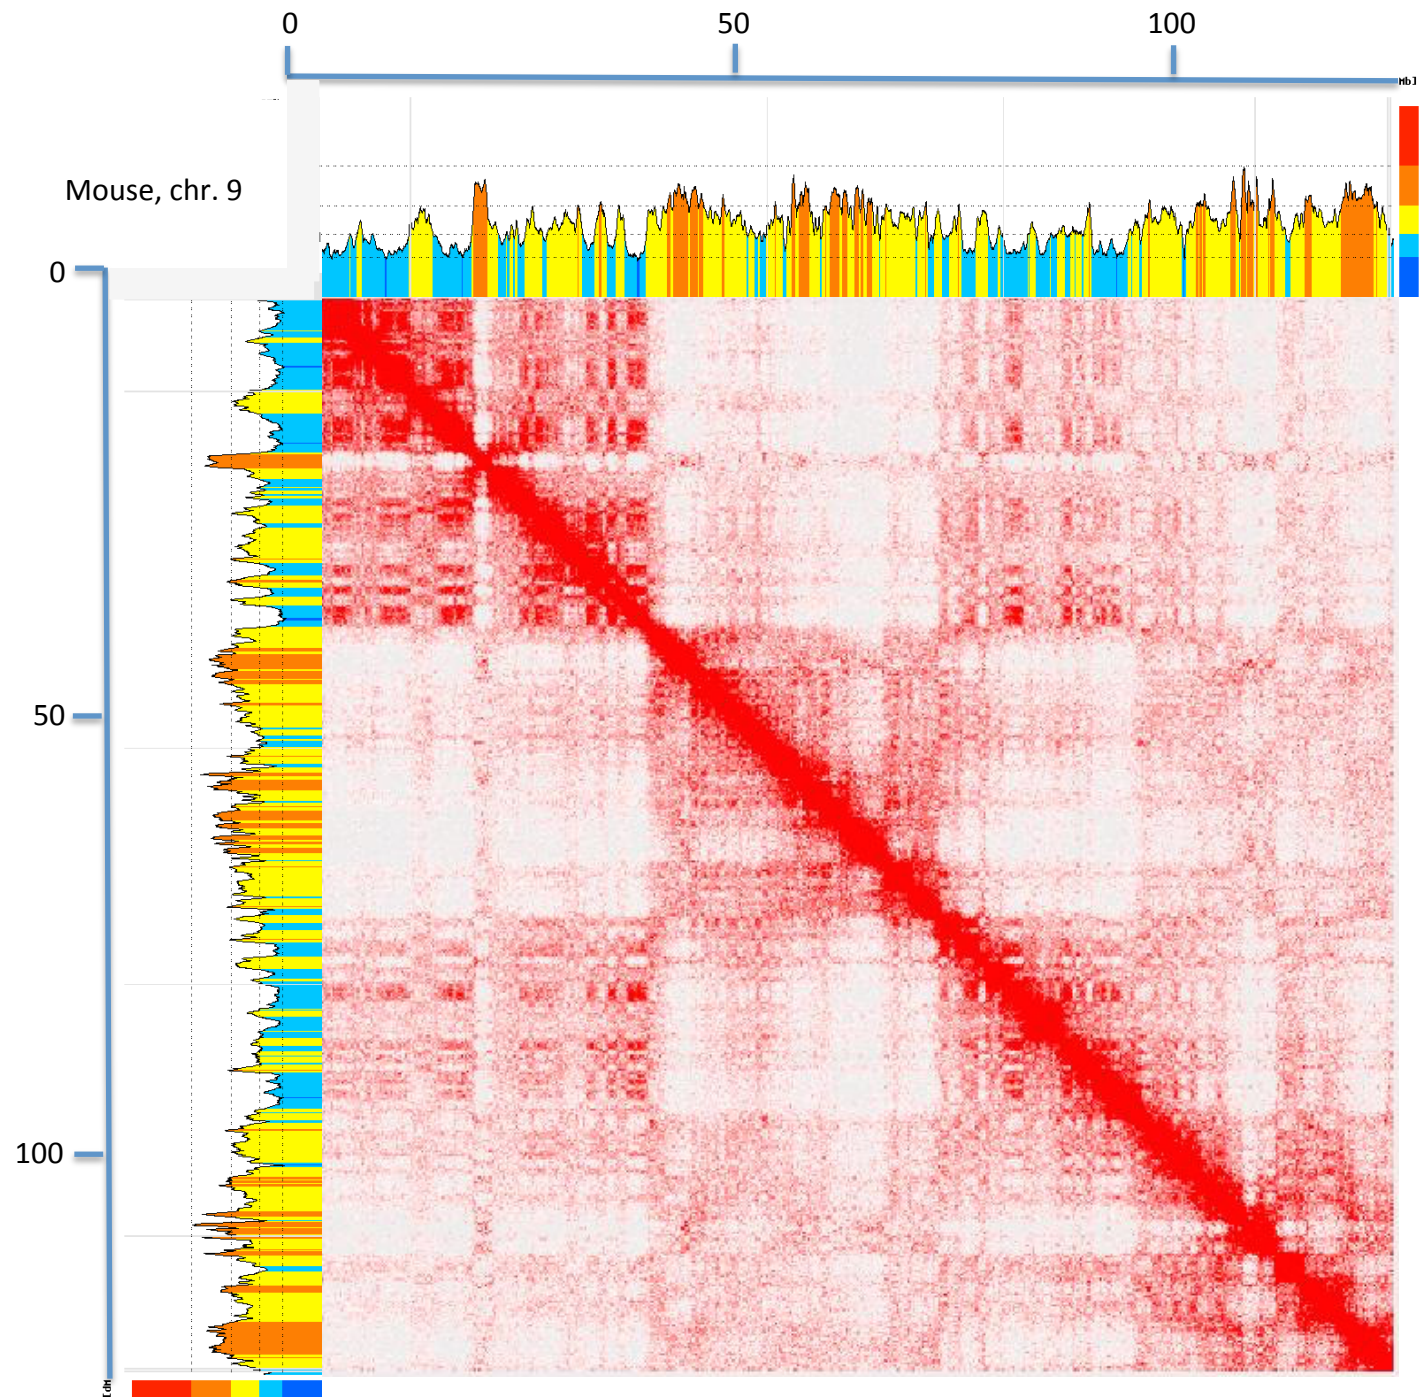

**Fig. S13**









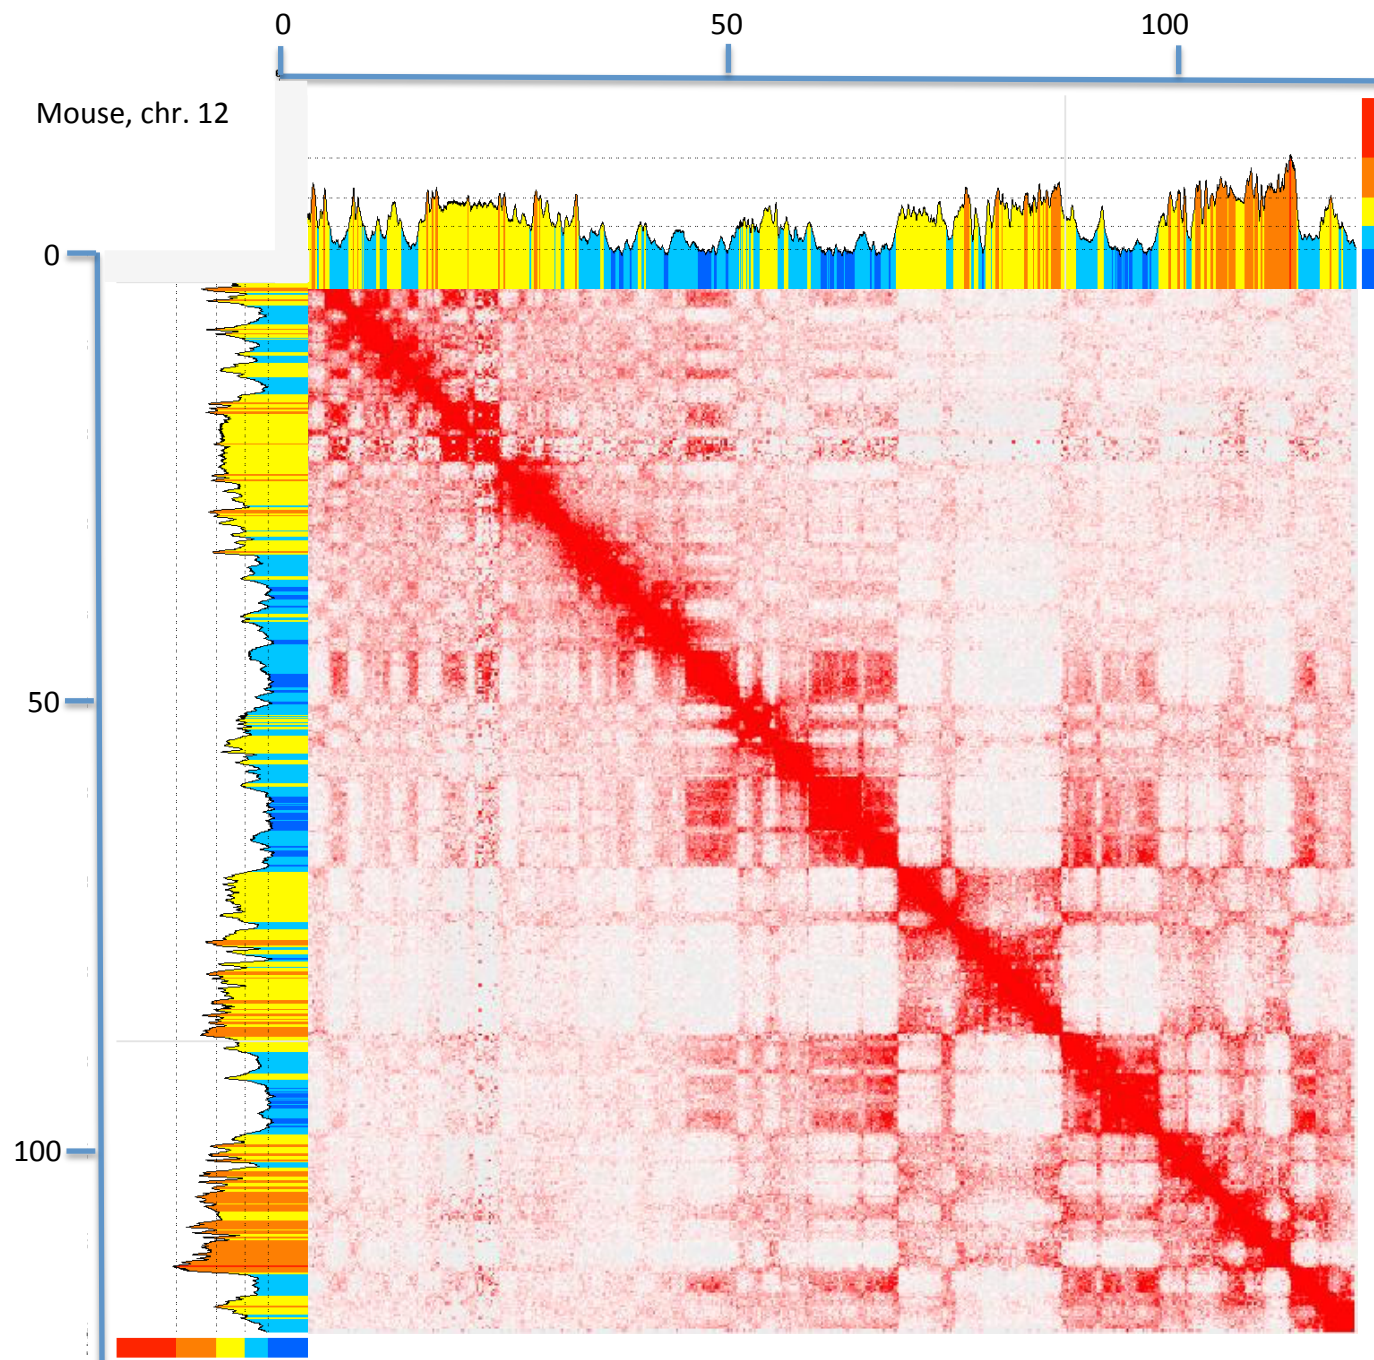

**Fig. S16**



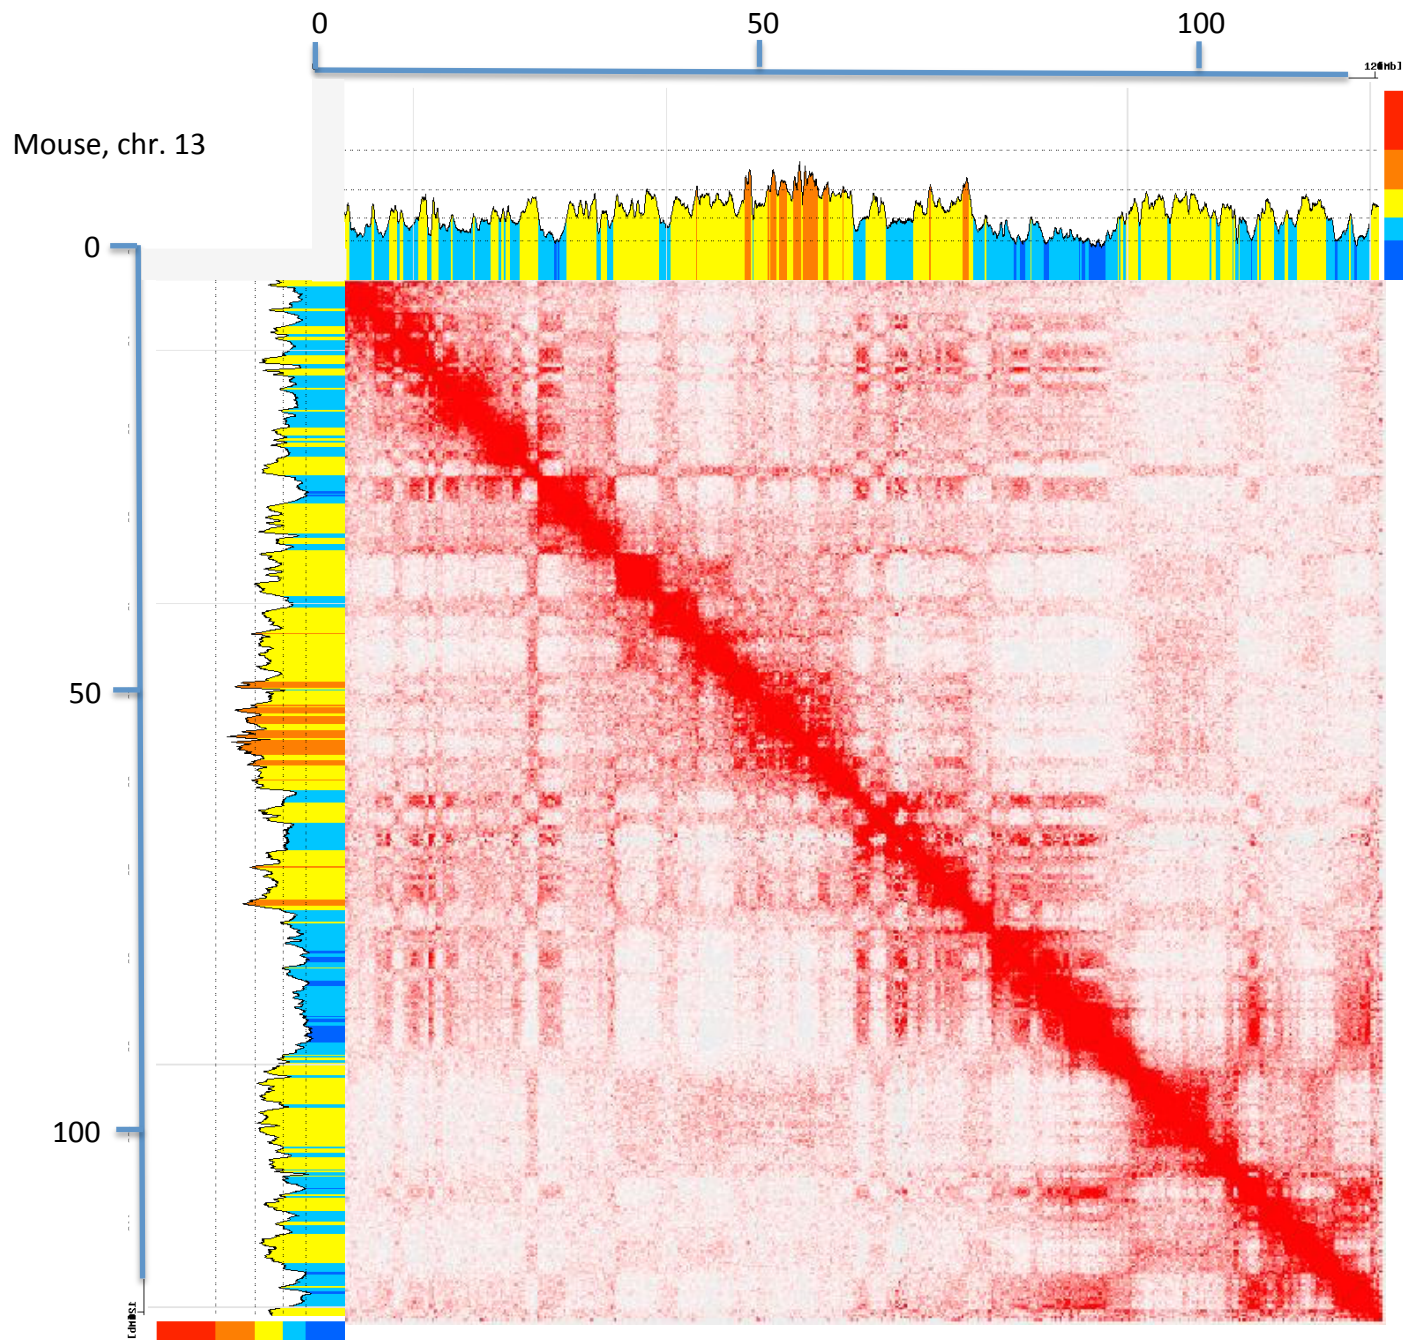

**Fig. S17**

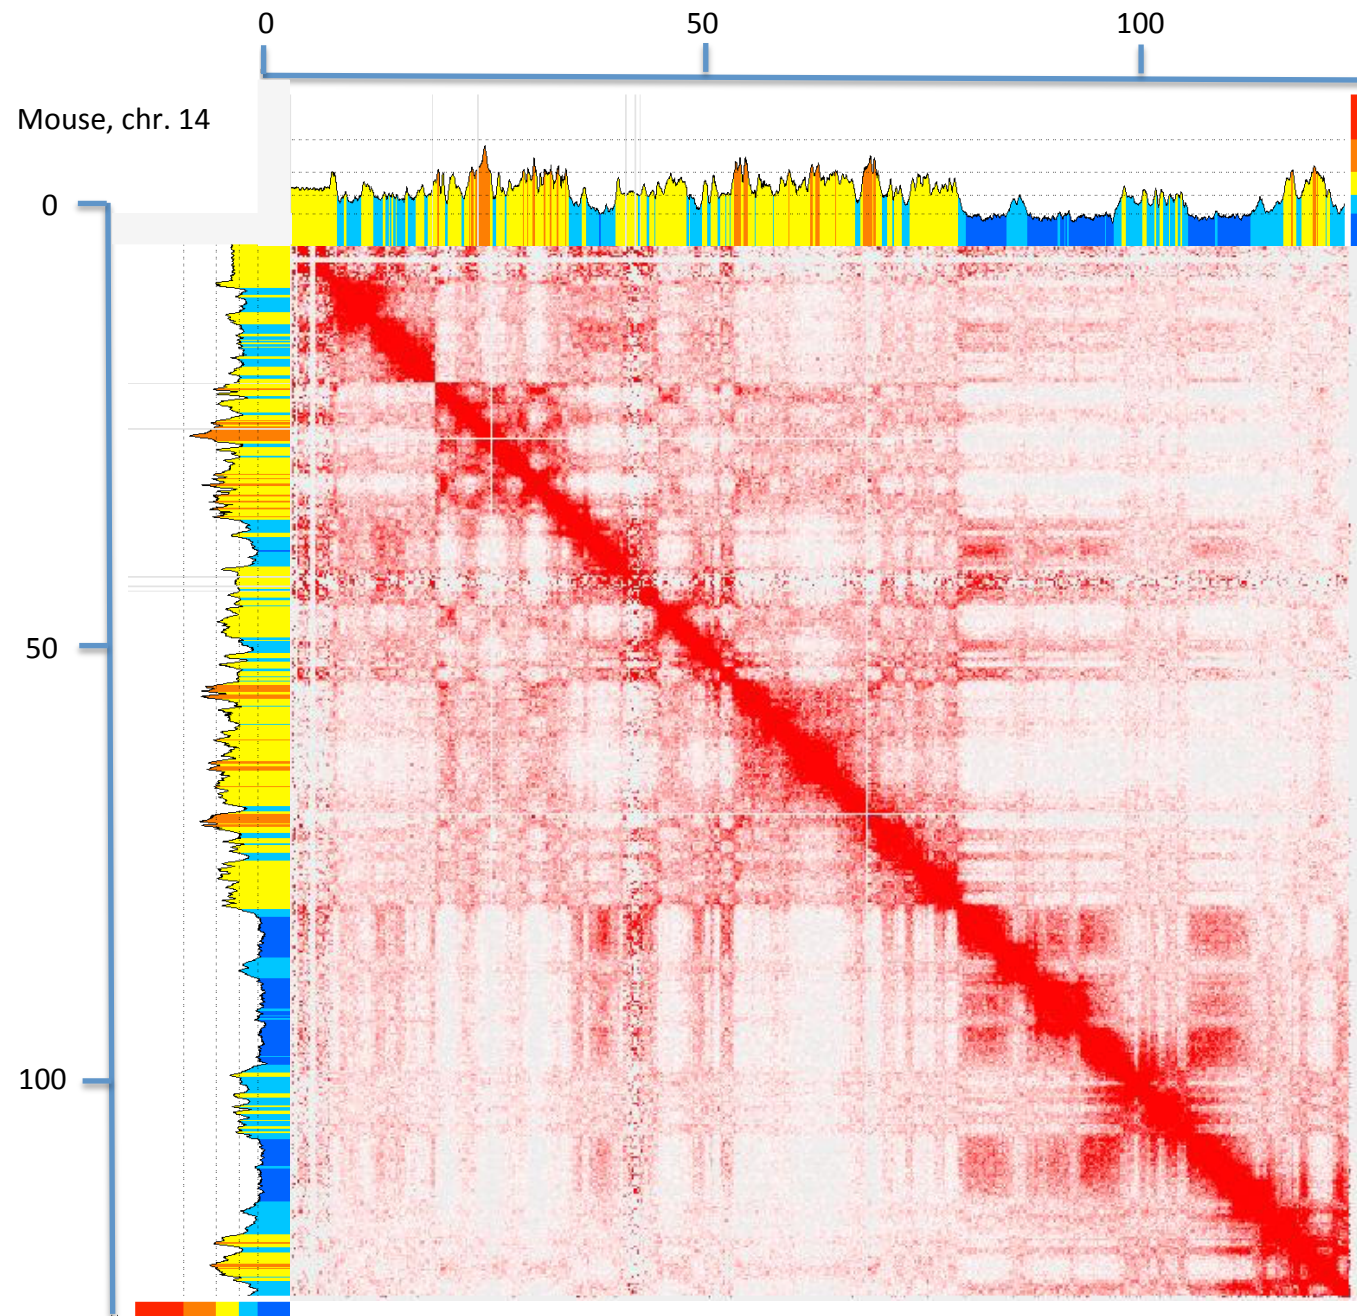

**Fig. S18**



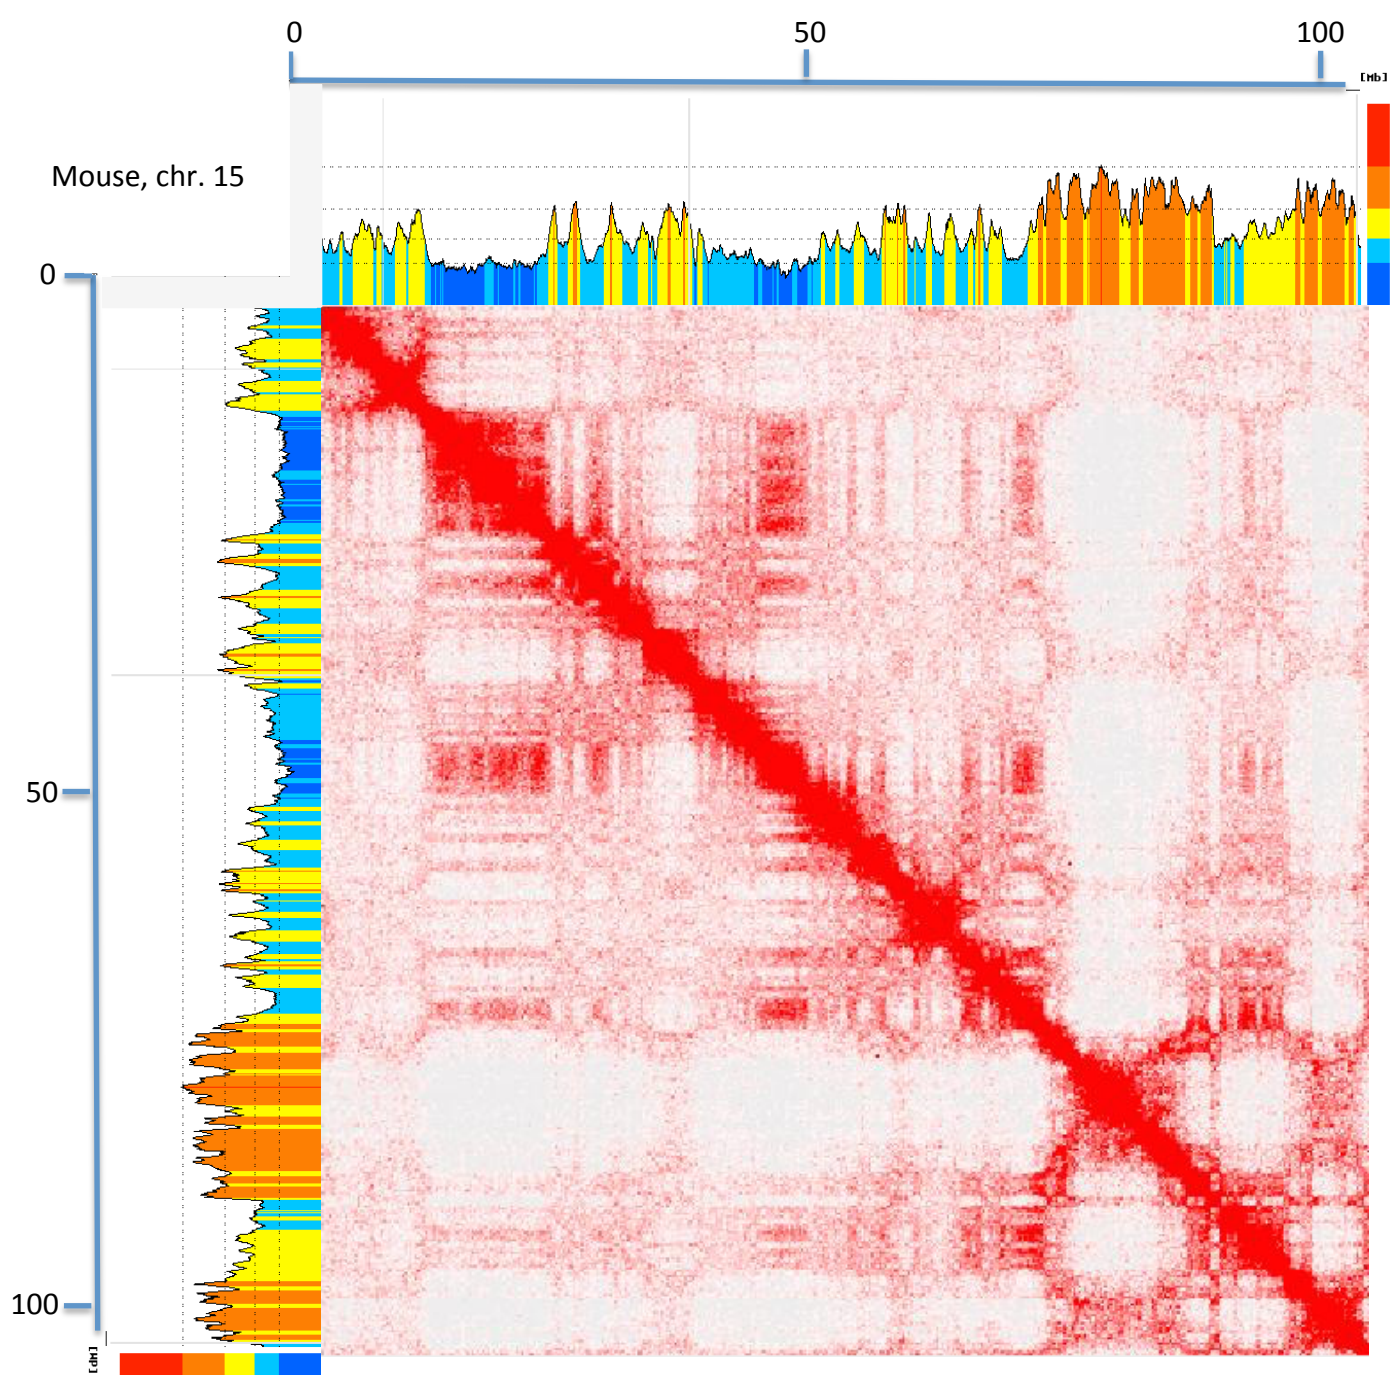

**Fig. S19**

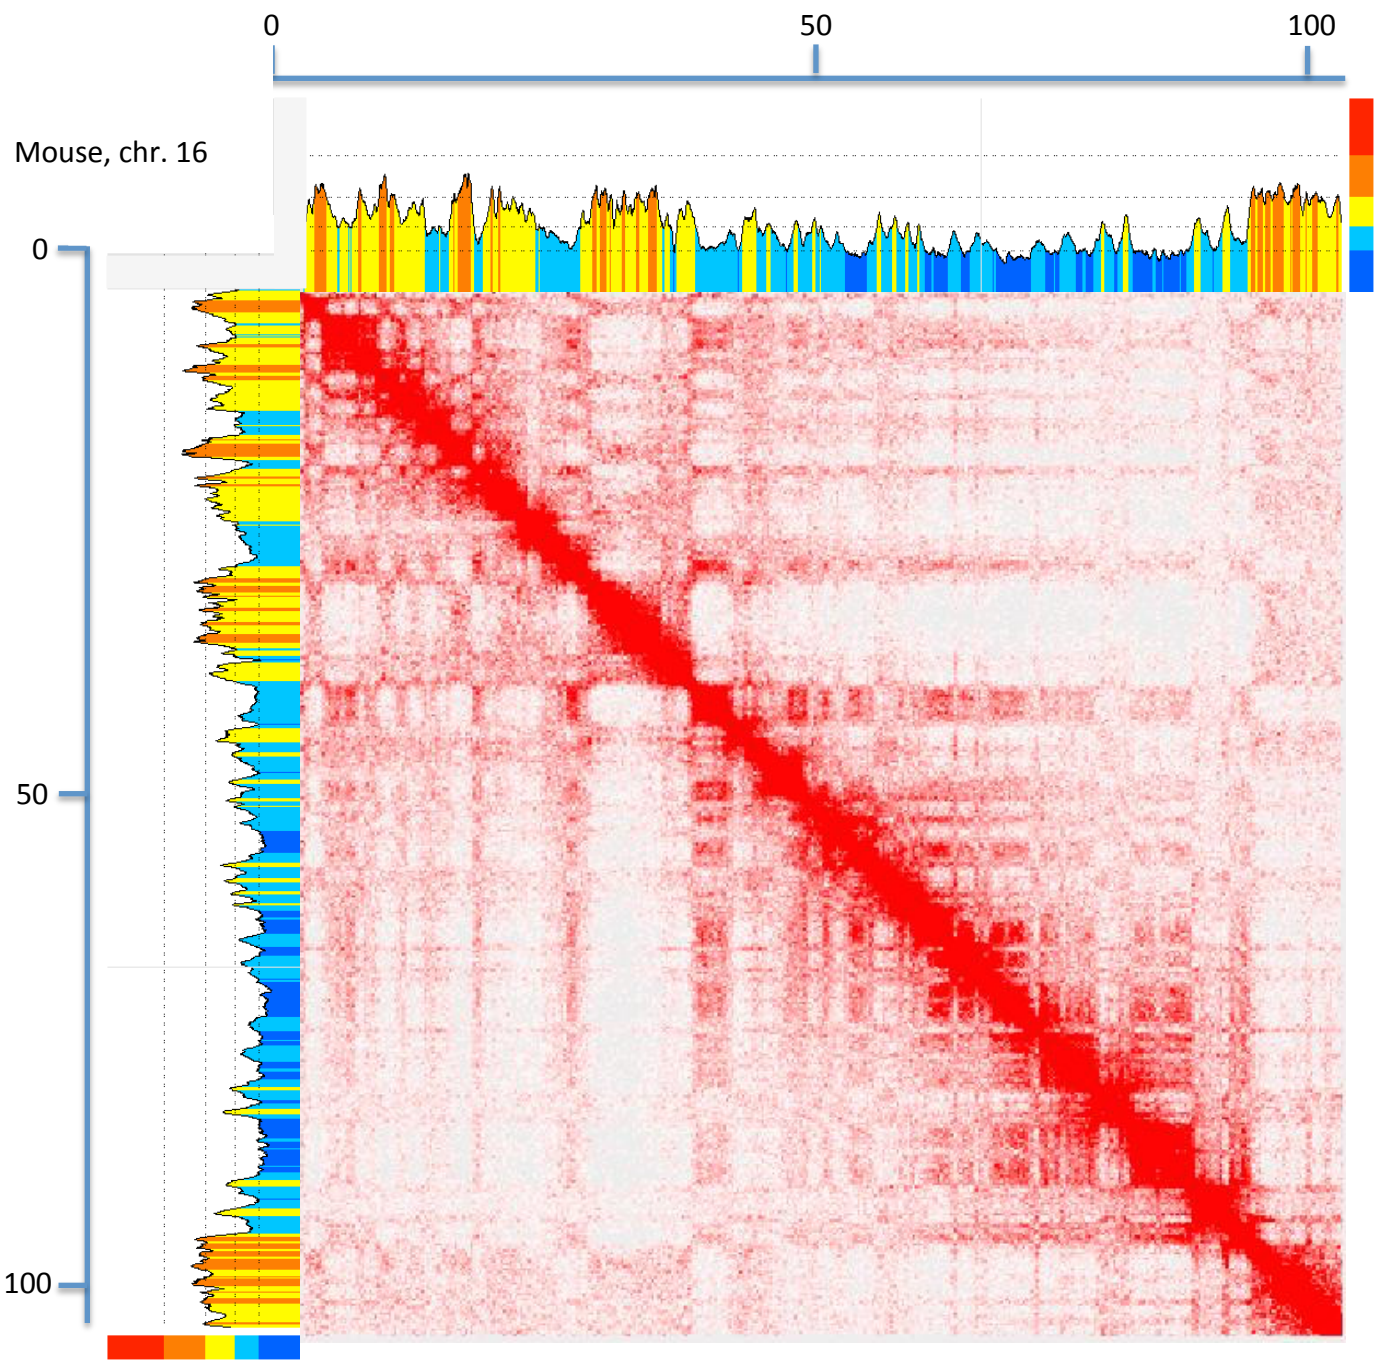



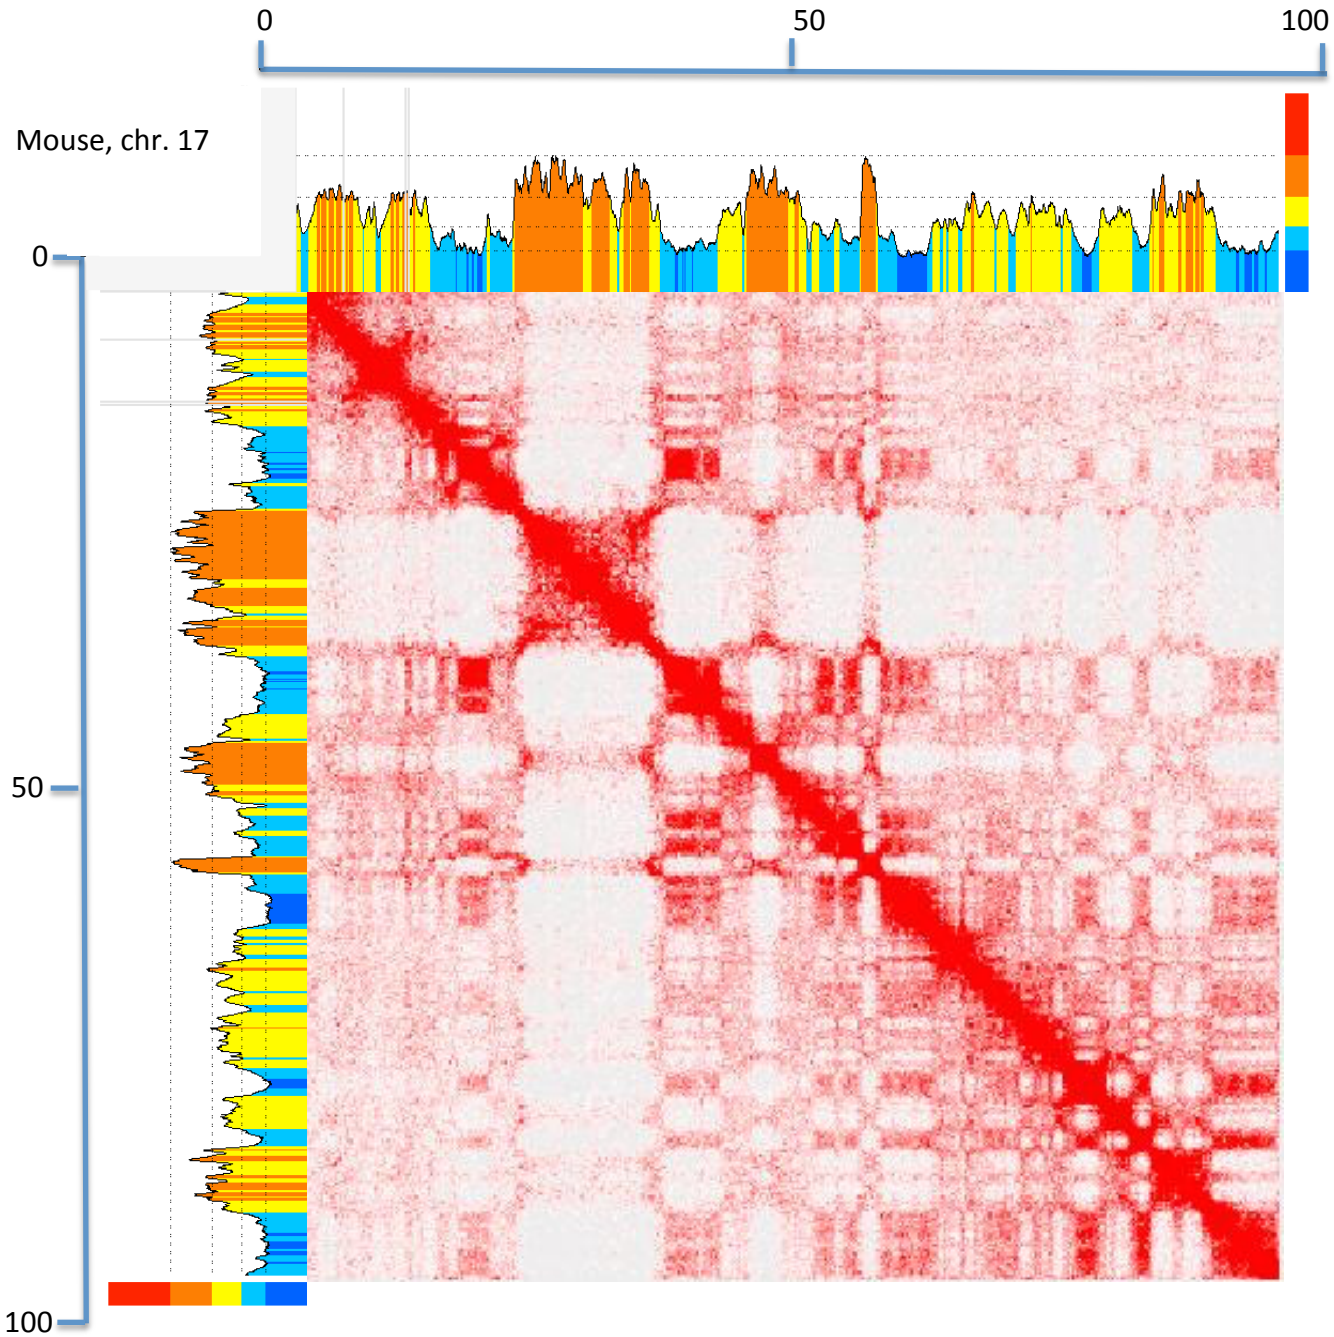

Fig. S21

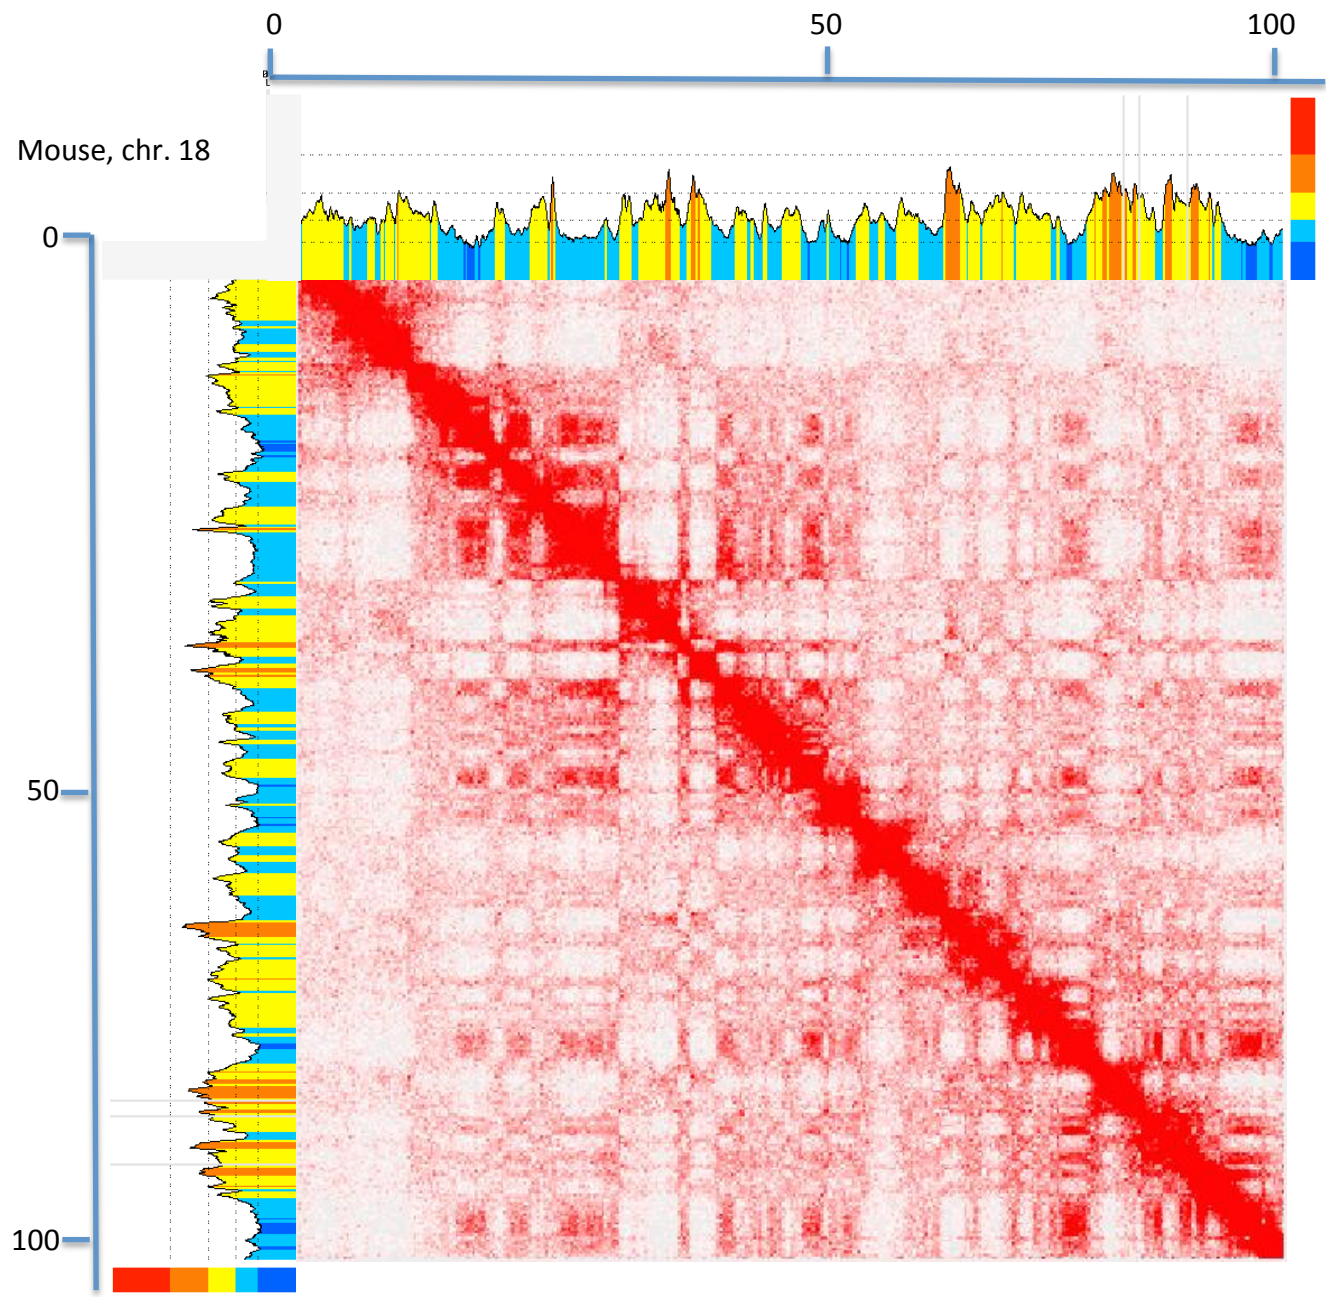

Fig. S22



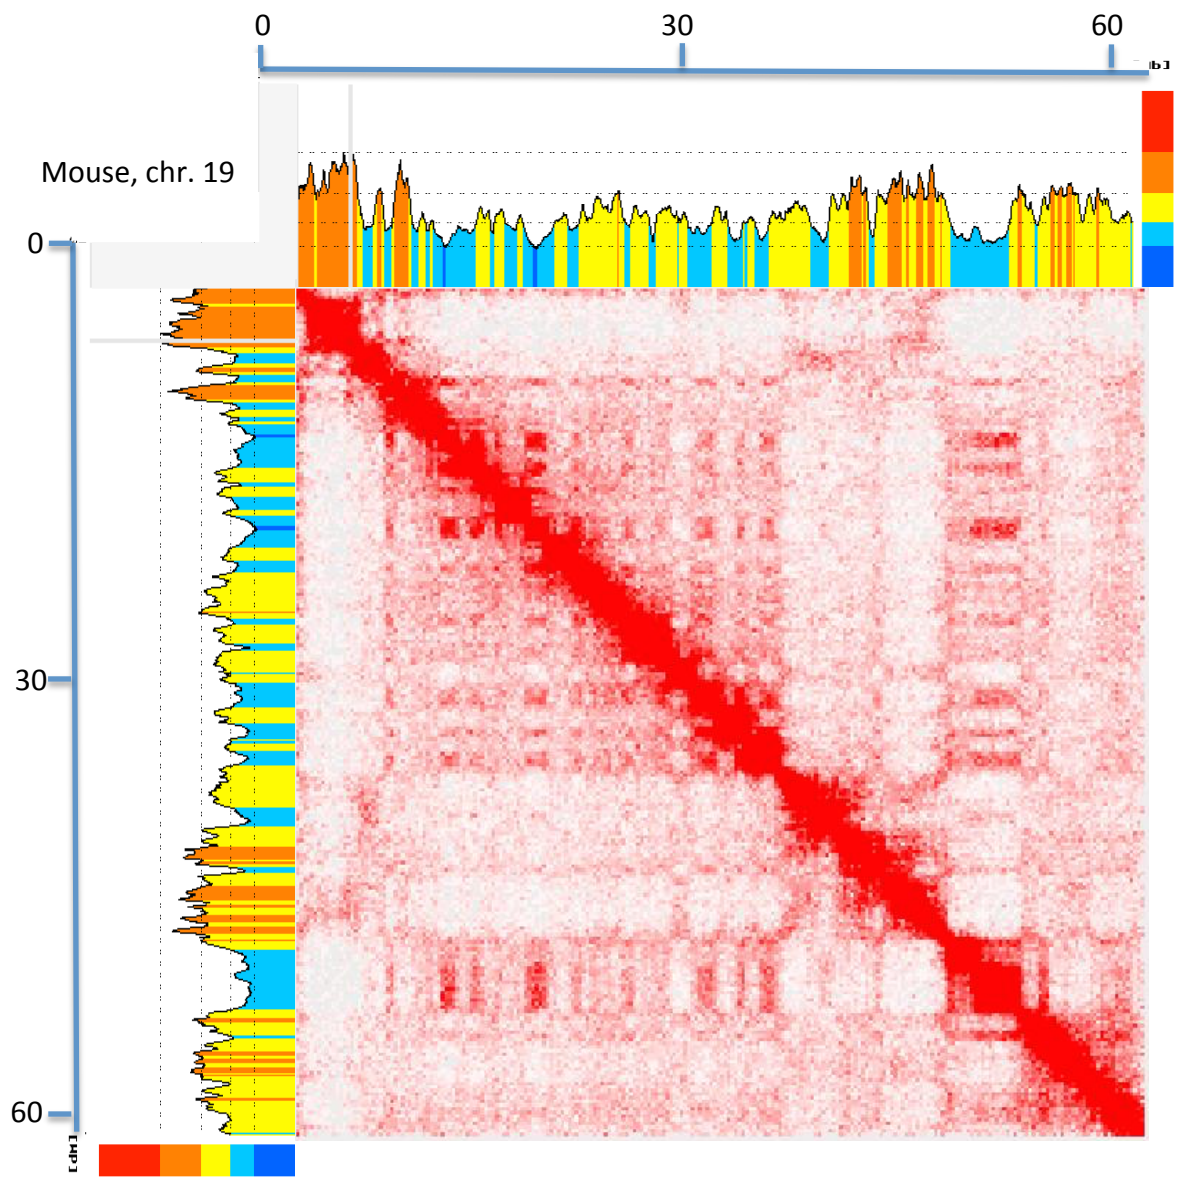

Fig. S23

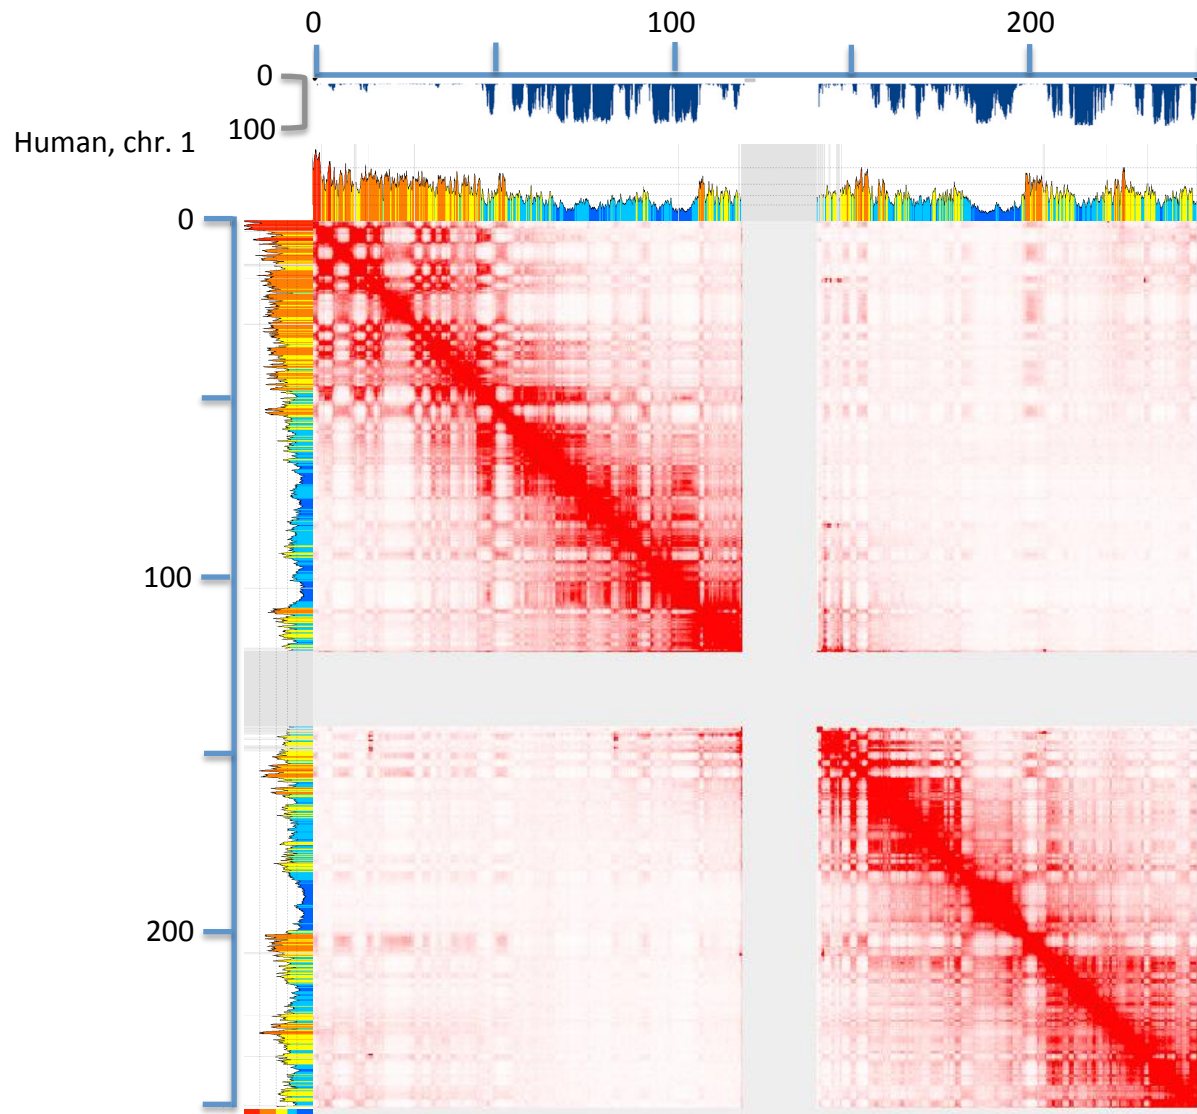

**Fig. S24**



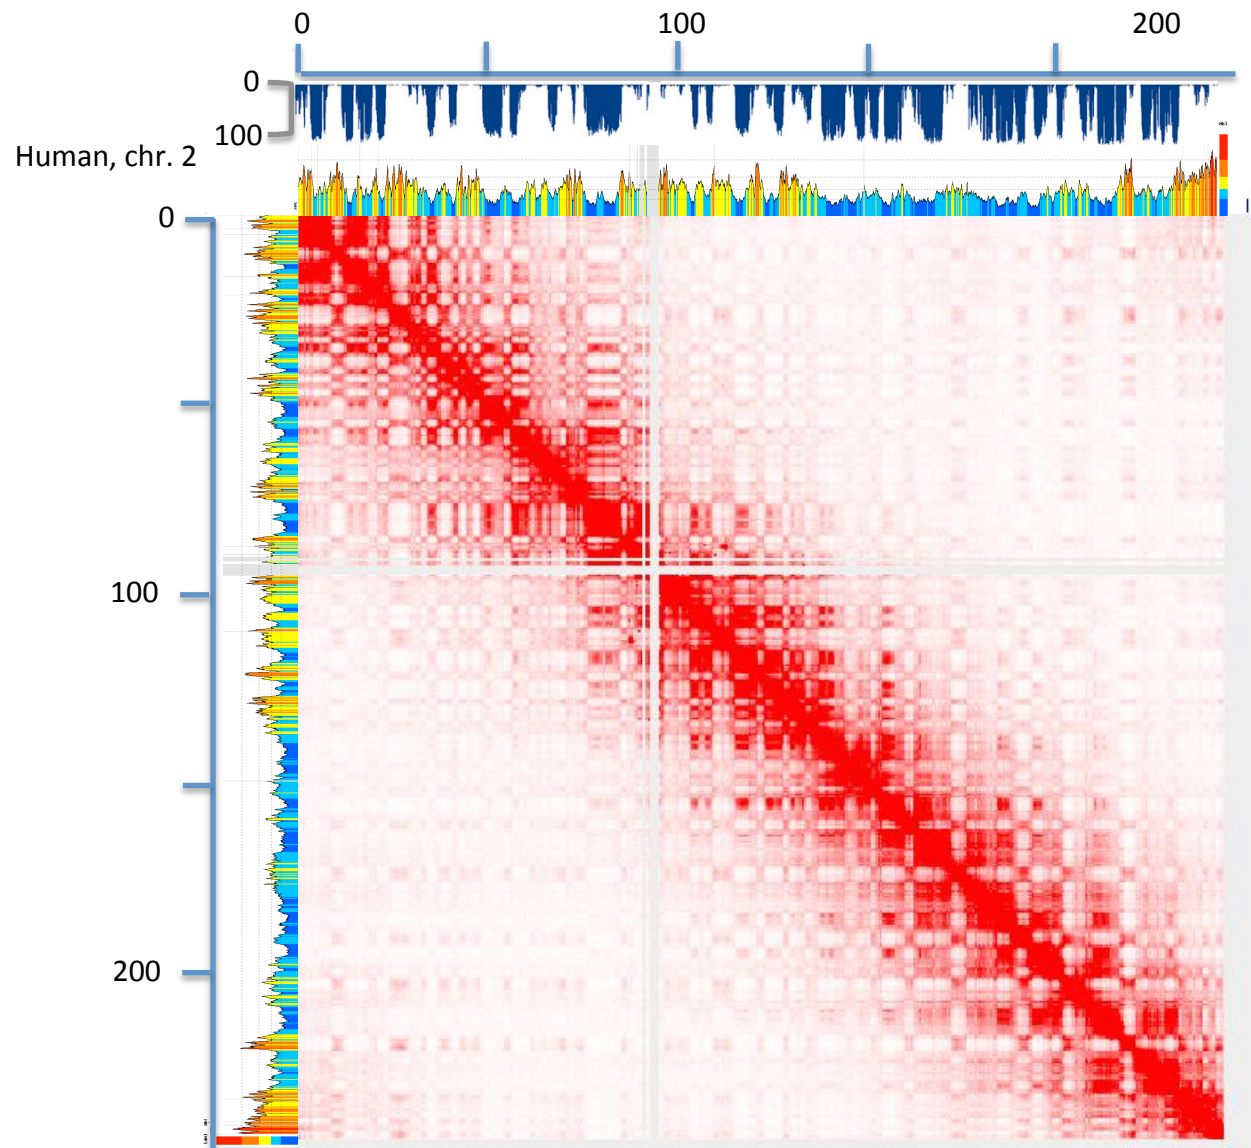

**Fig. S25**

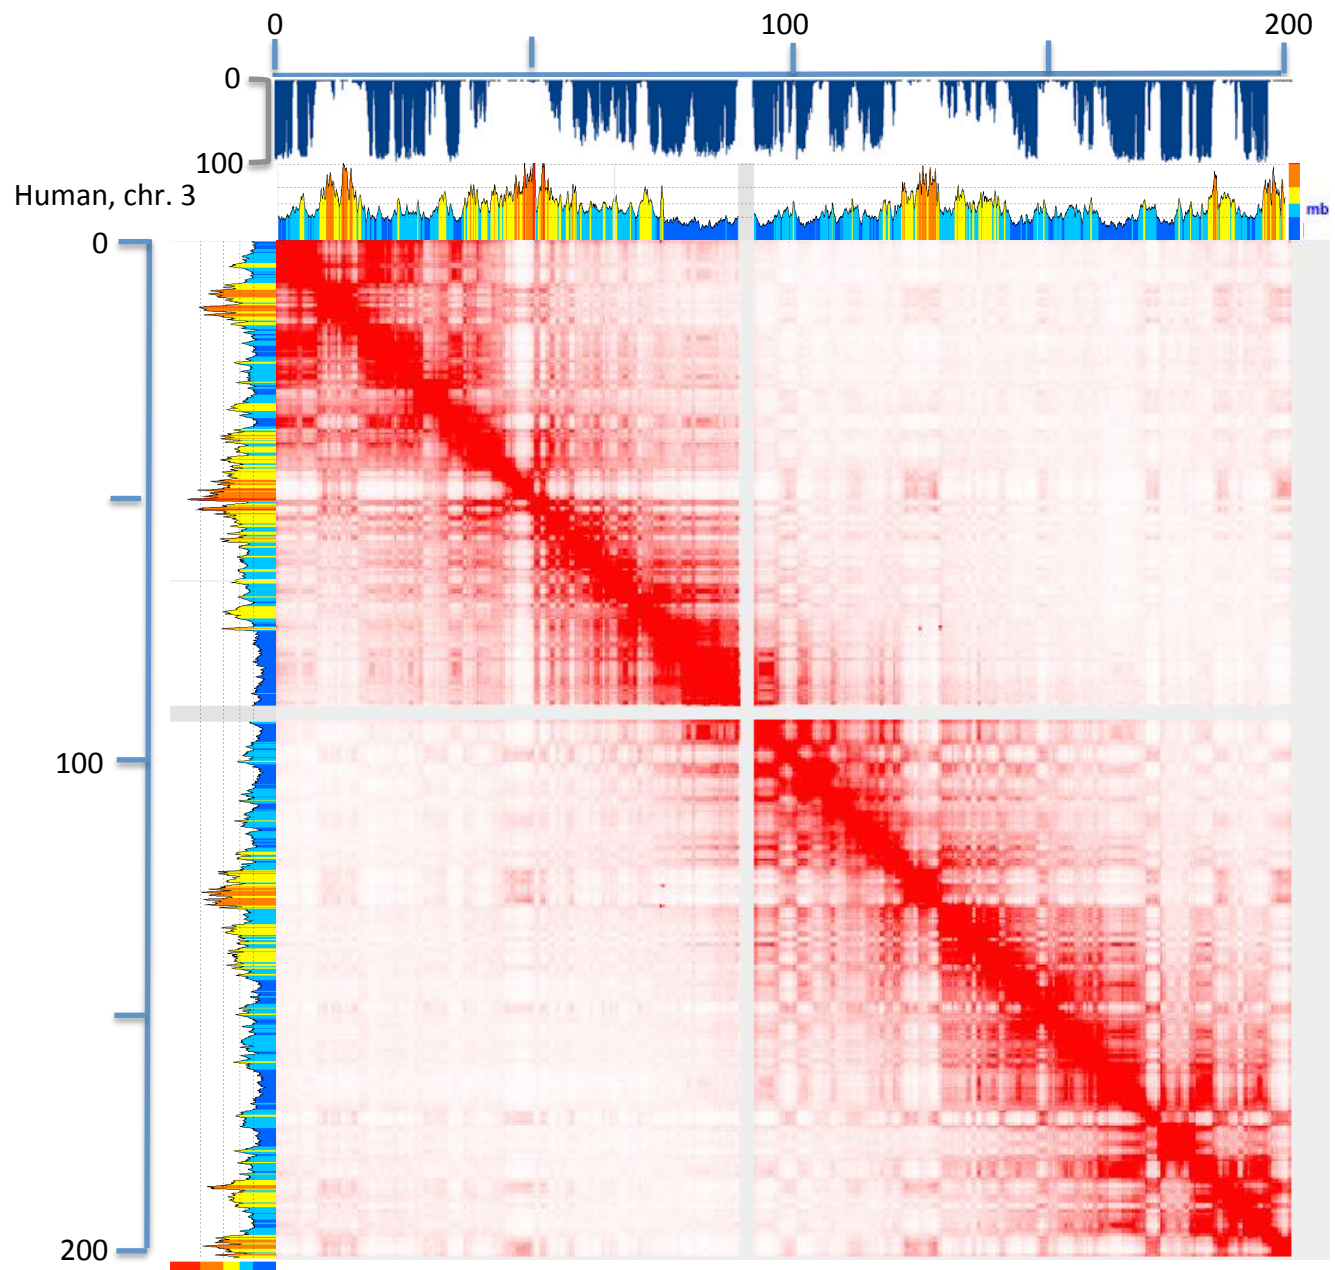

**Fig. S26**

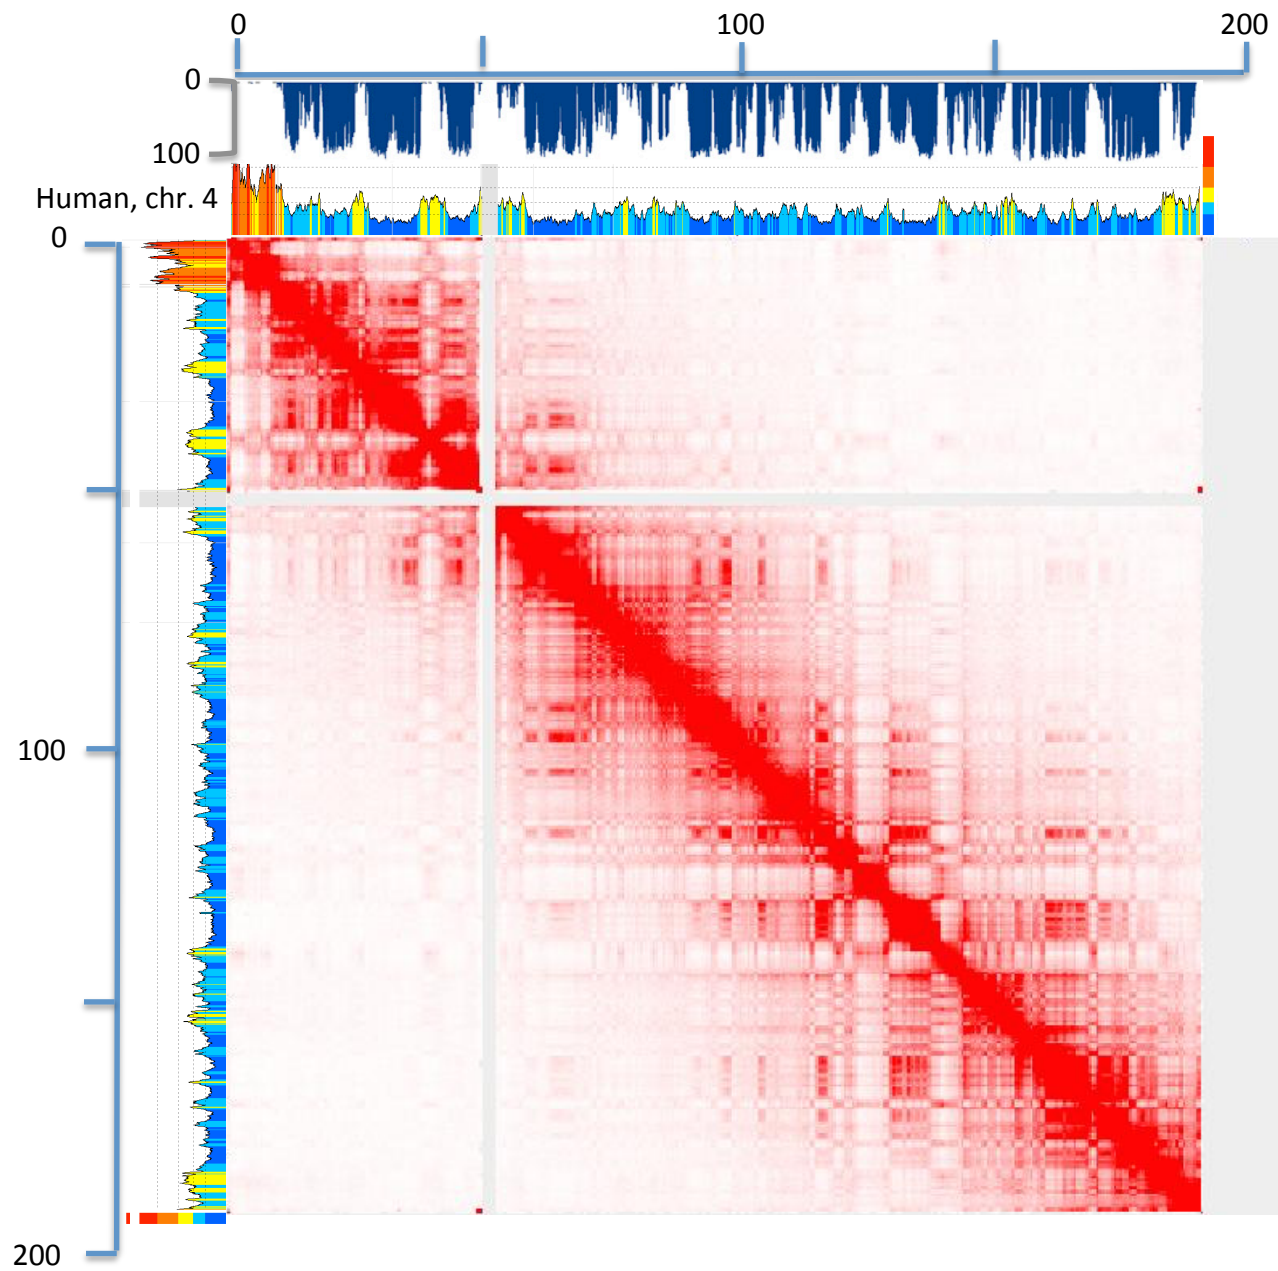

**Fig. S27**



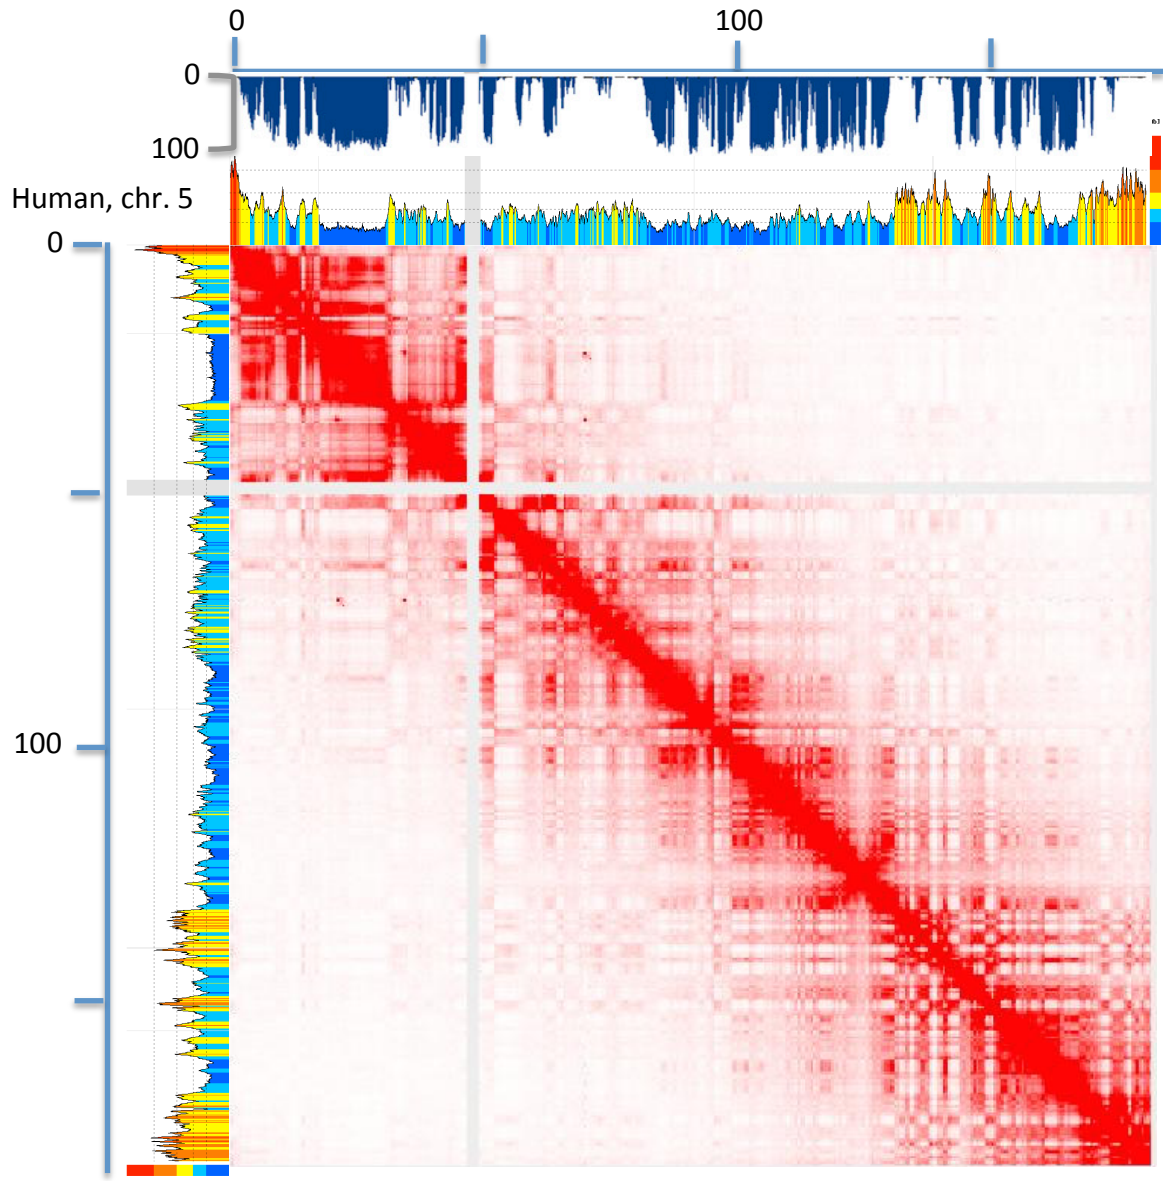

**Fig. S28**

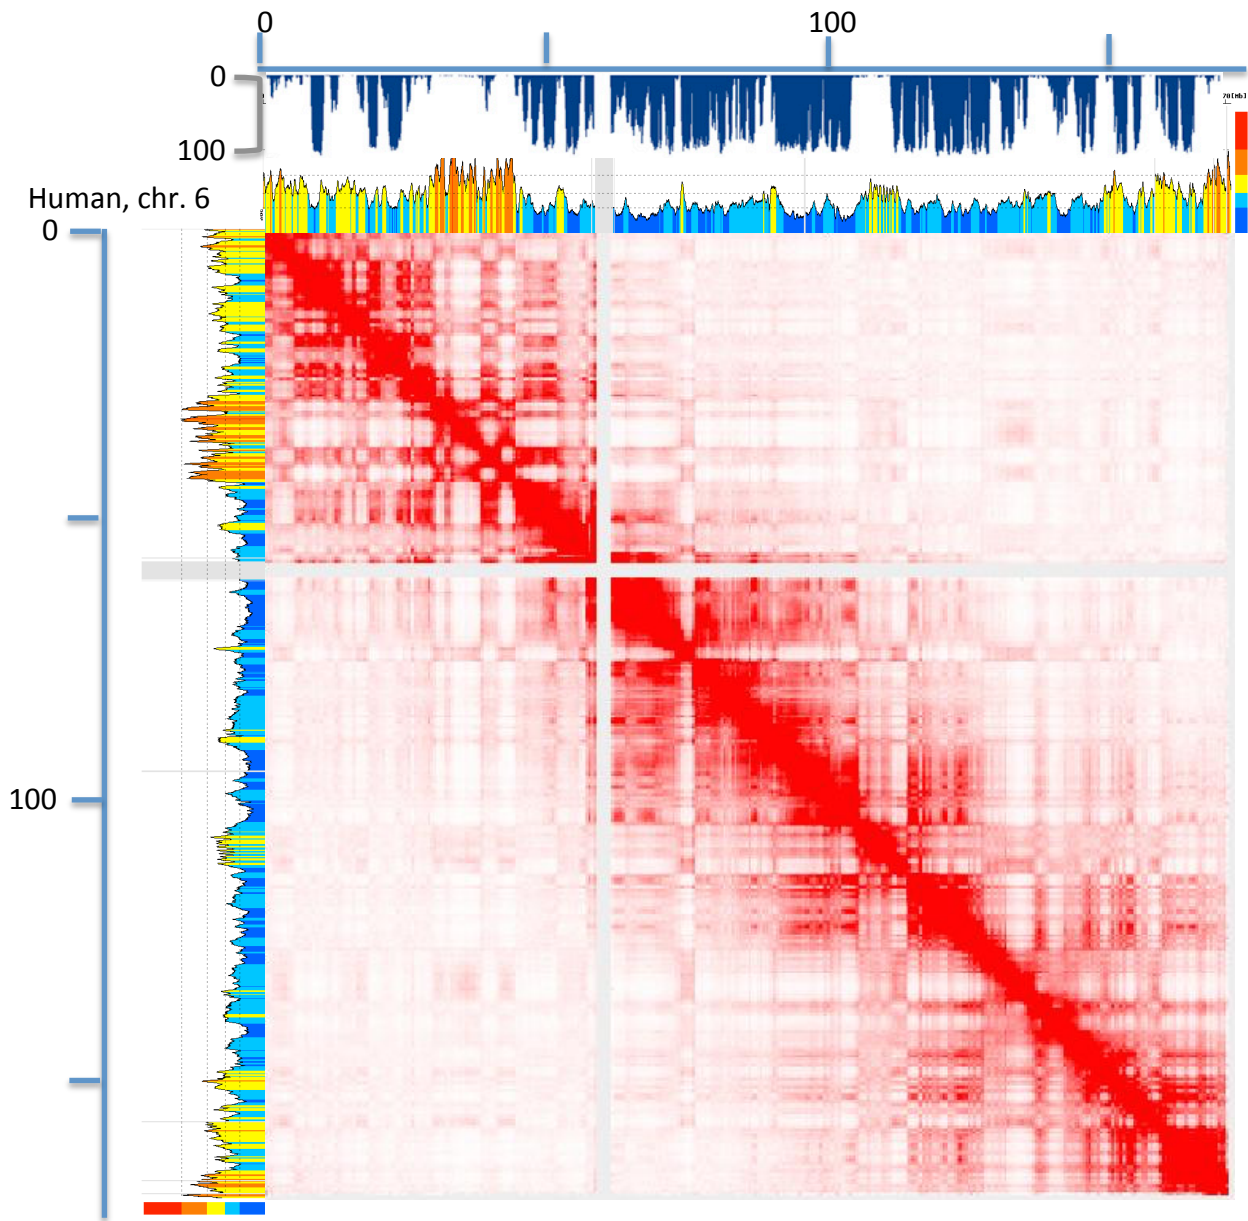

**Fig. S29**

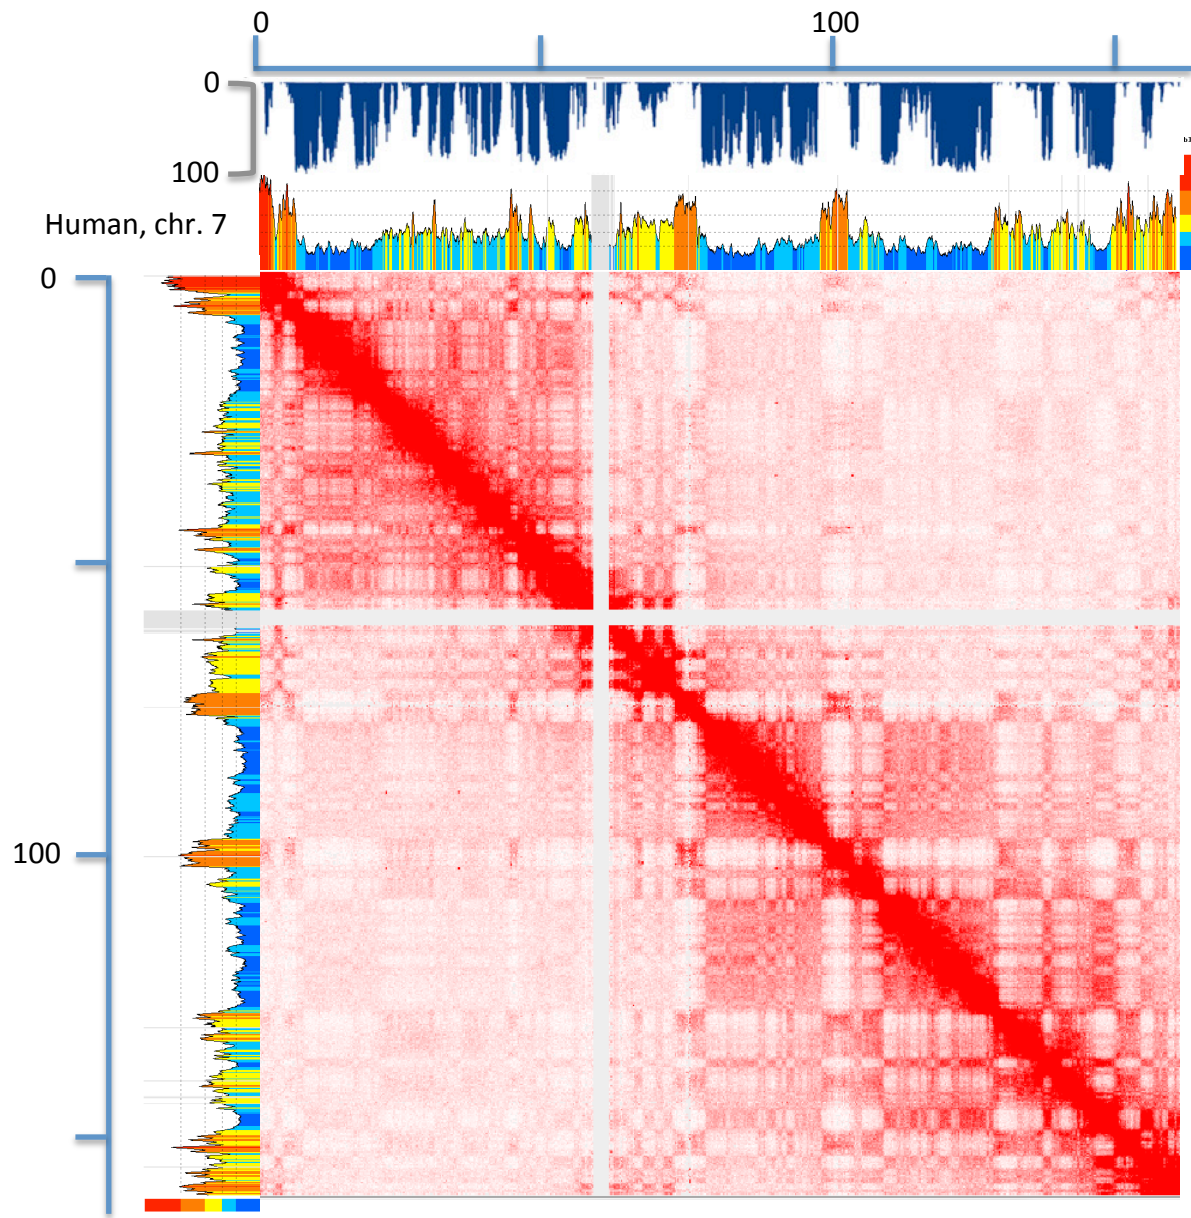

**Fig. S30**



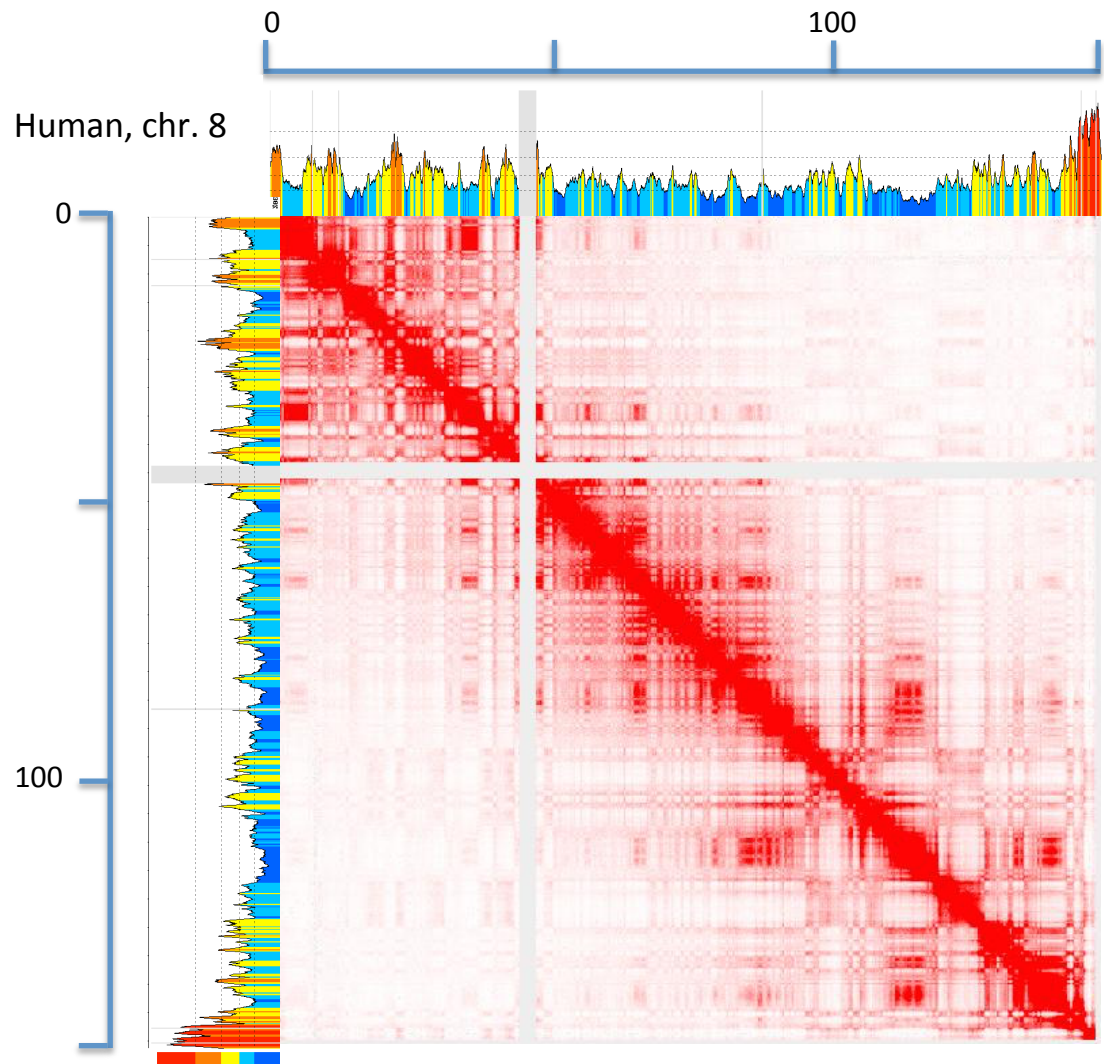

**Fig. S31**





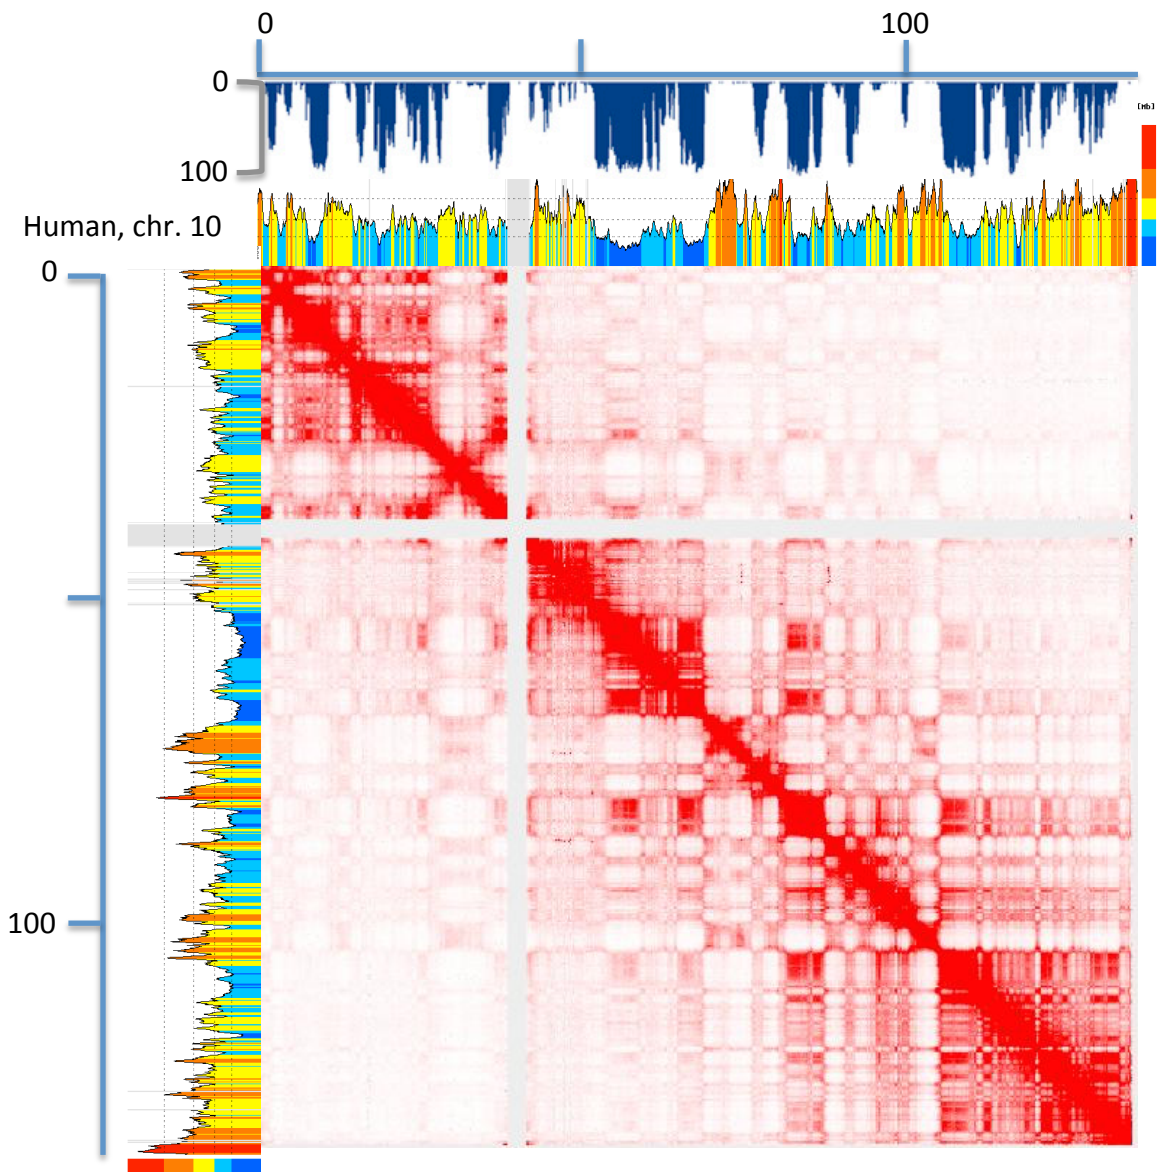

**Fig. S33**



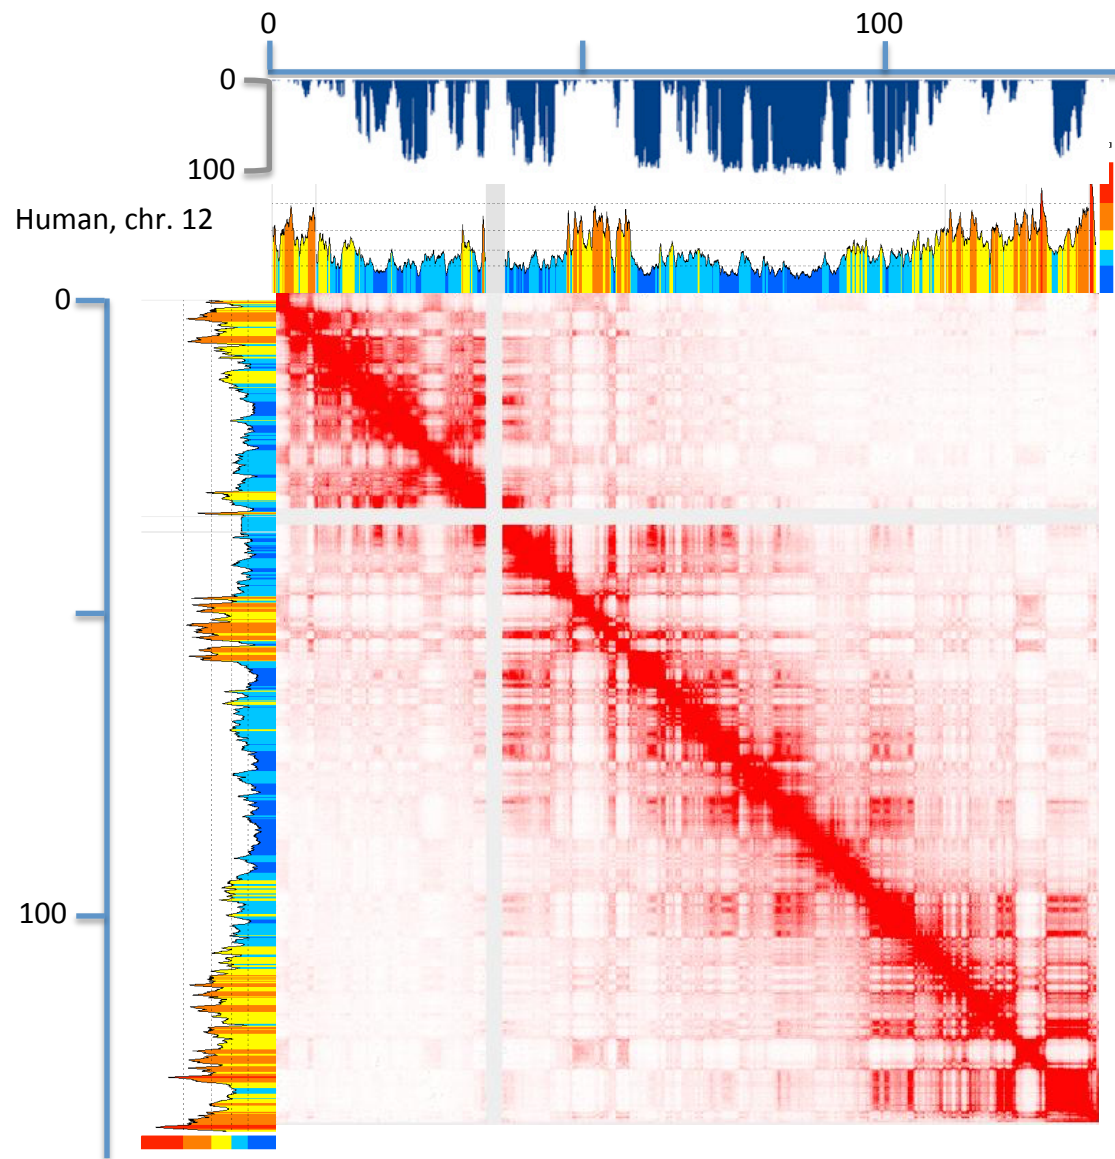

Fig. S35



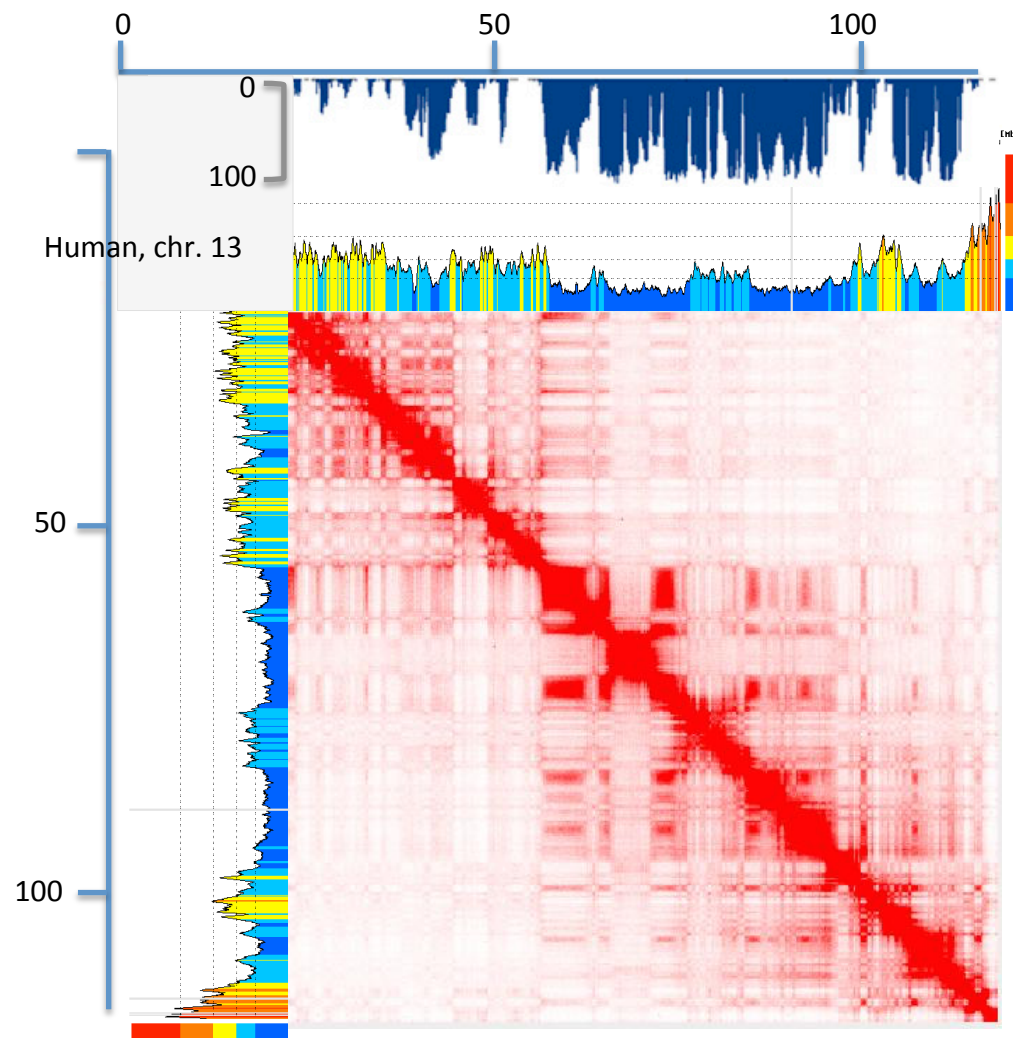

Fig. S36



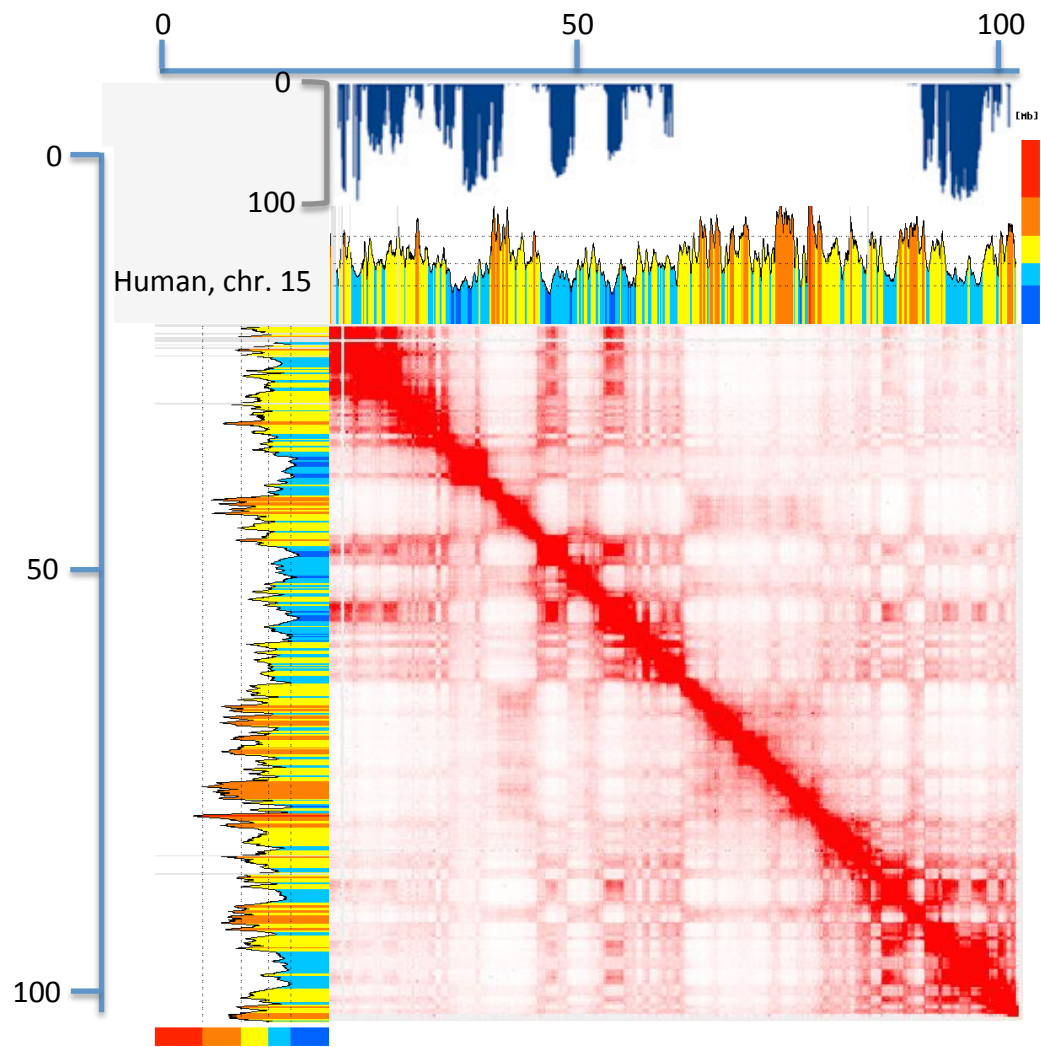

Fig. S38



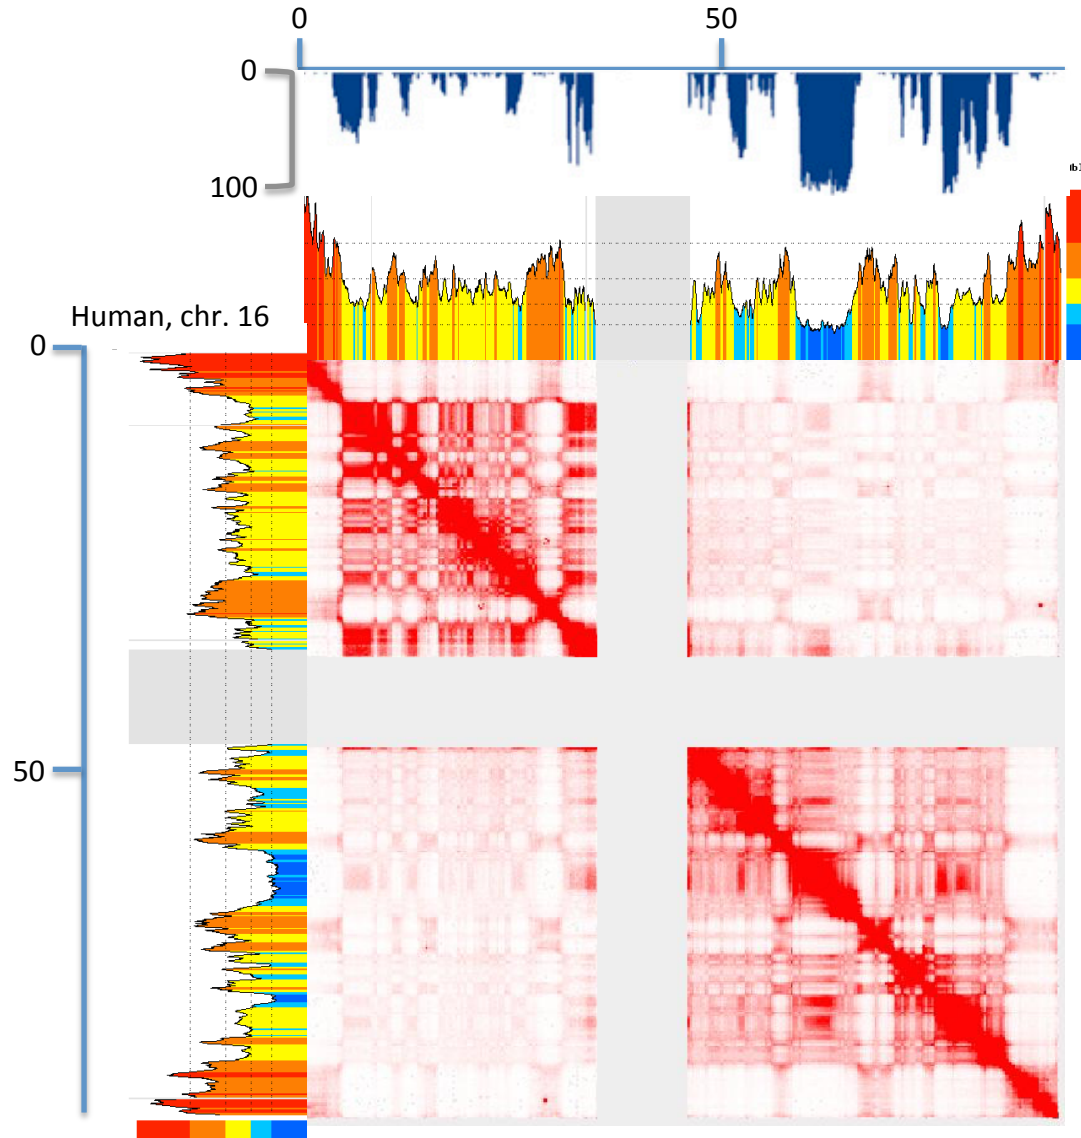

Fig. S39

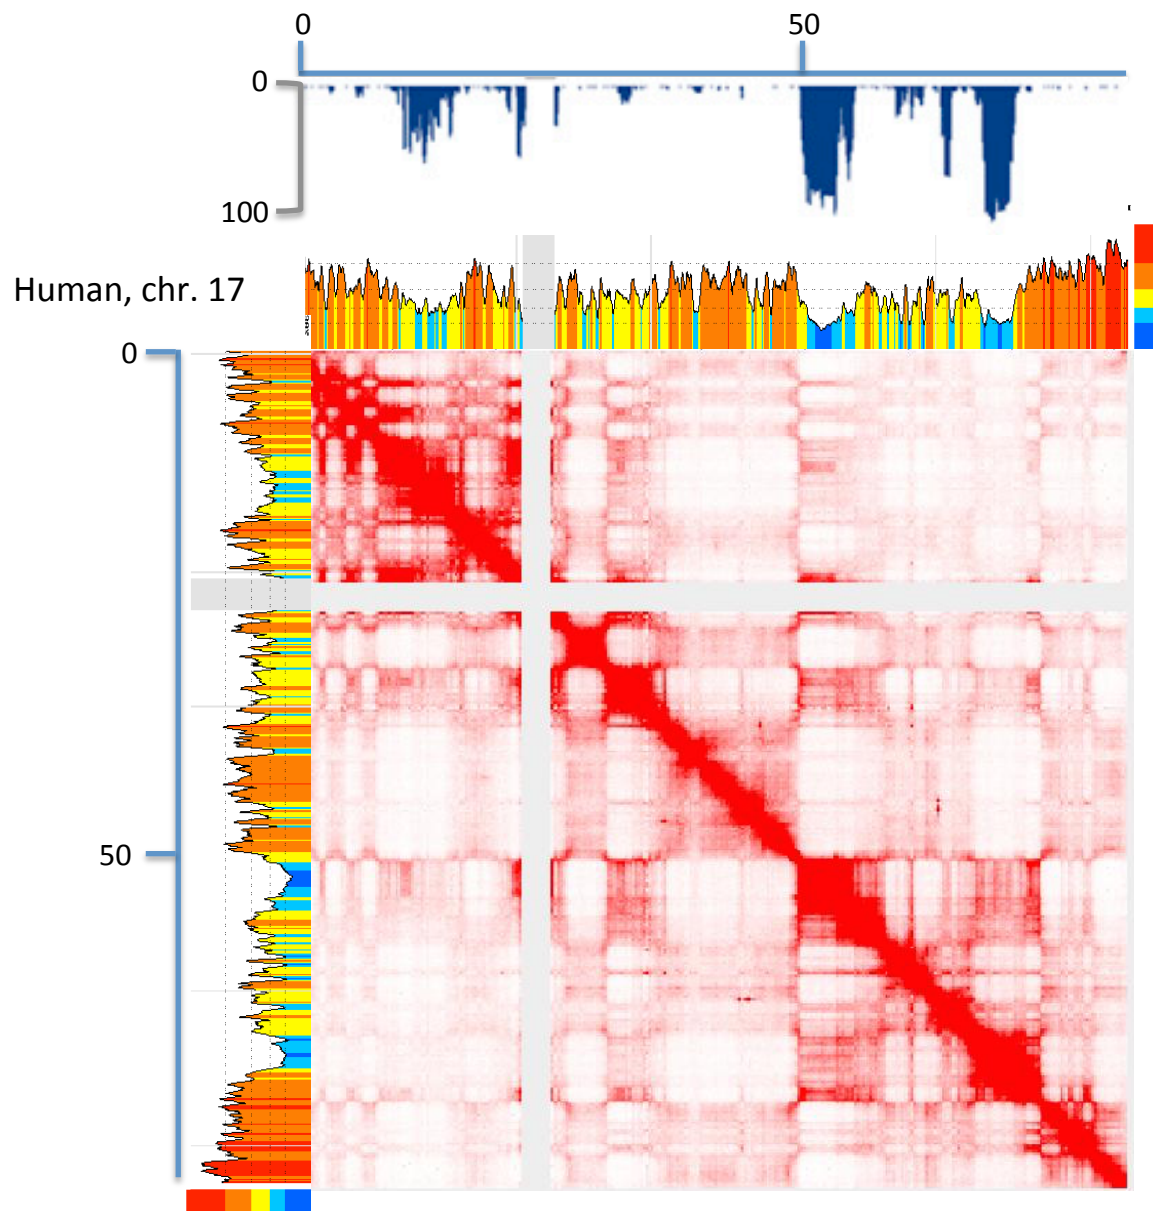

**Fig. S40**

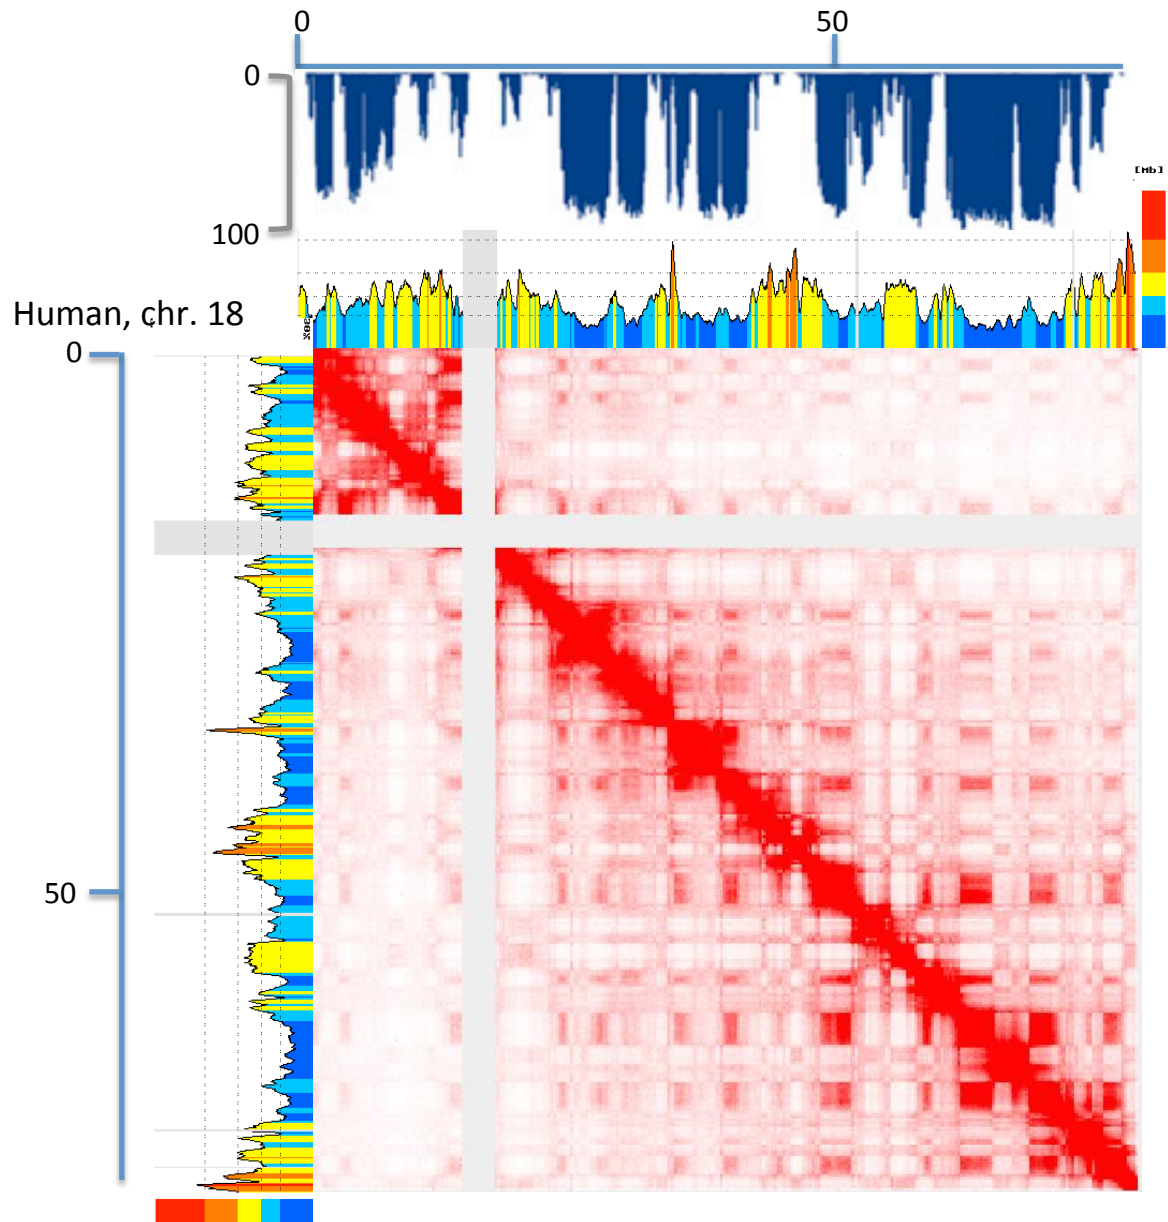

Fig. S41



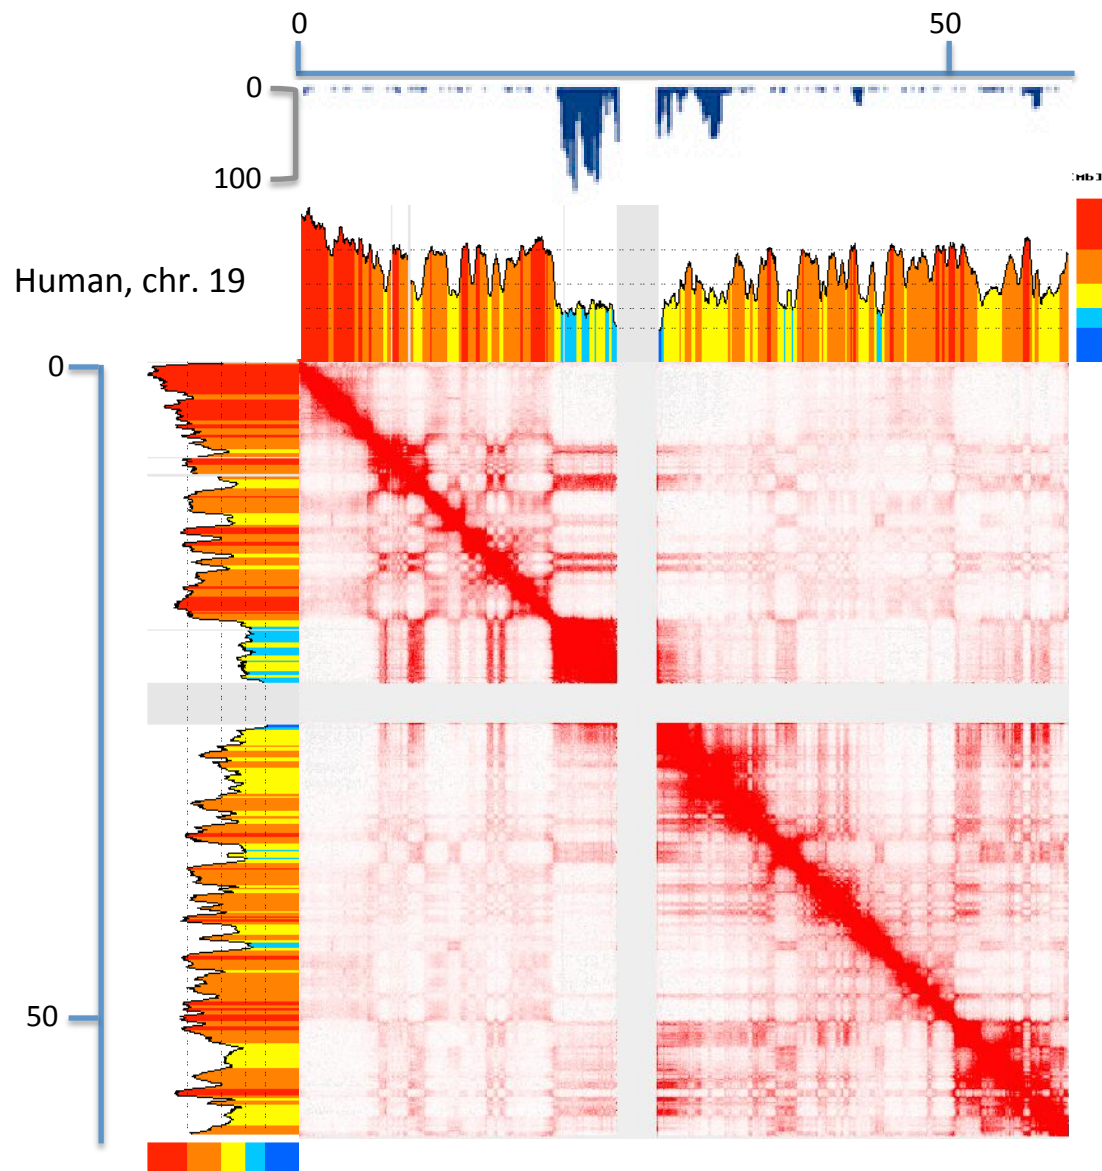

Fig. S42

Human, chr. 20

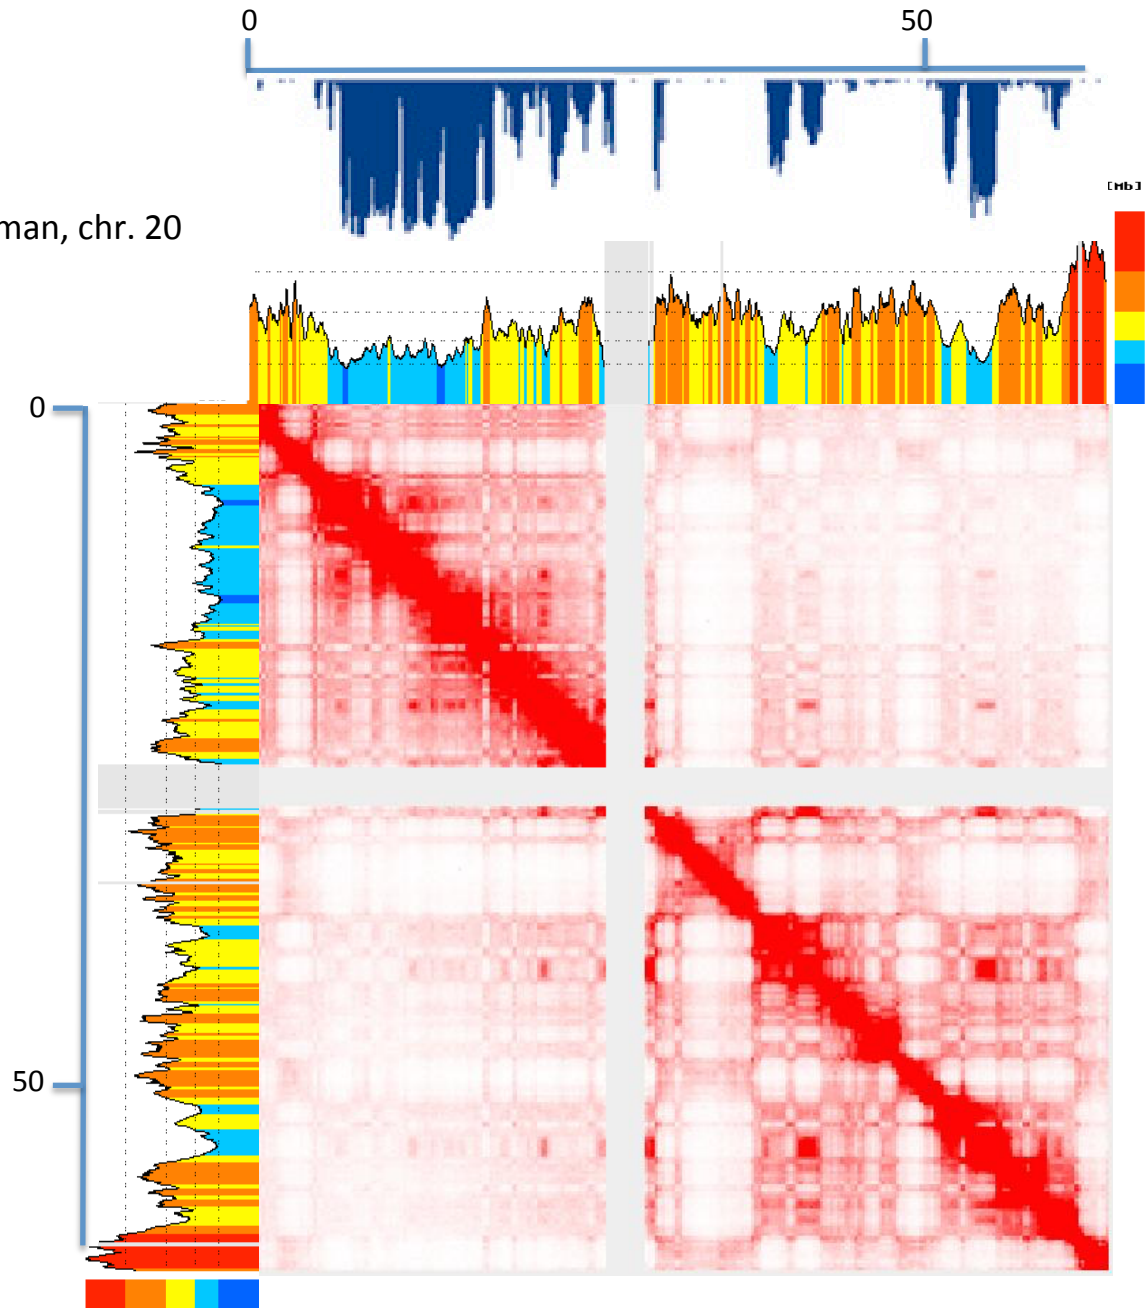

Fig. S43

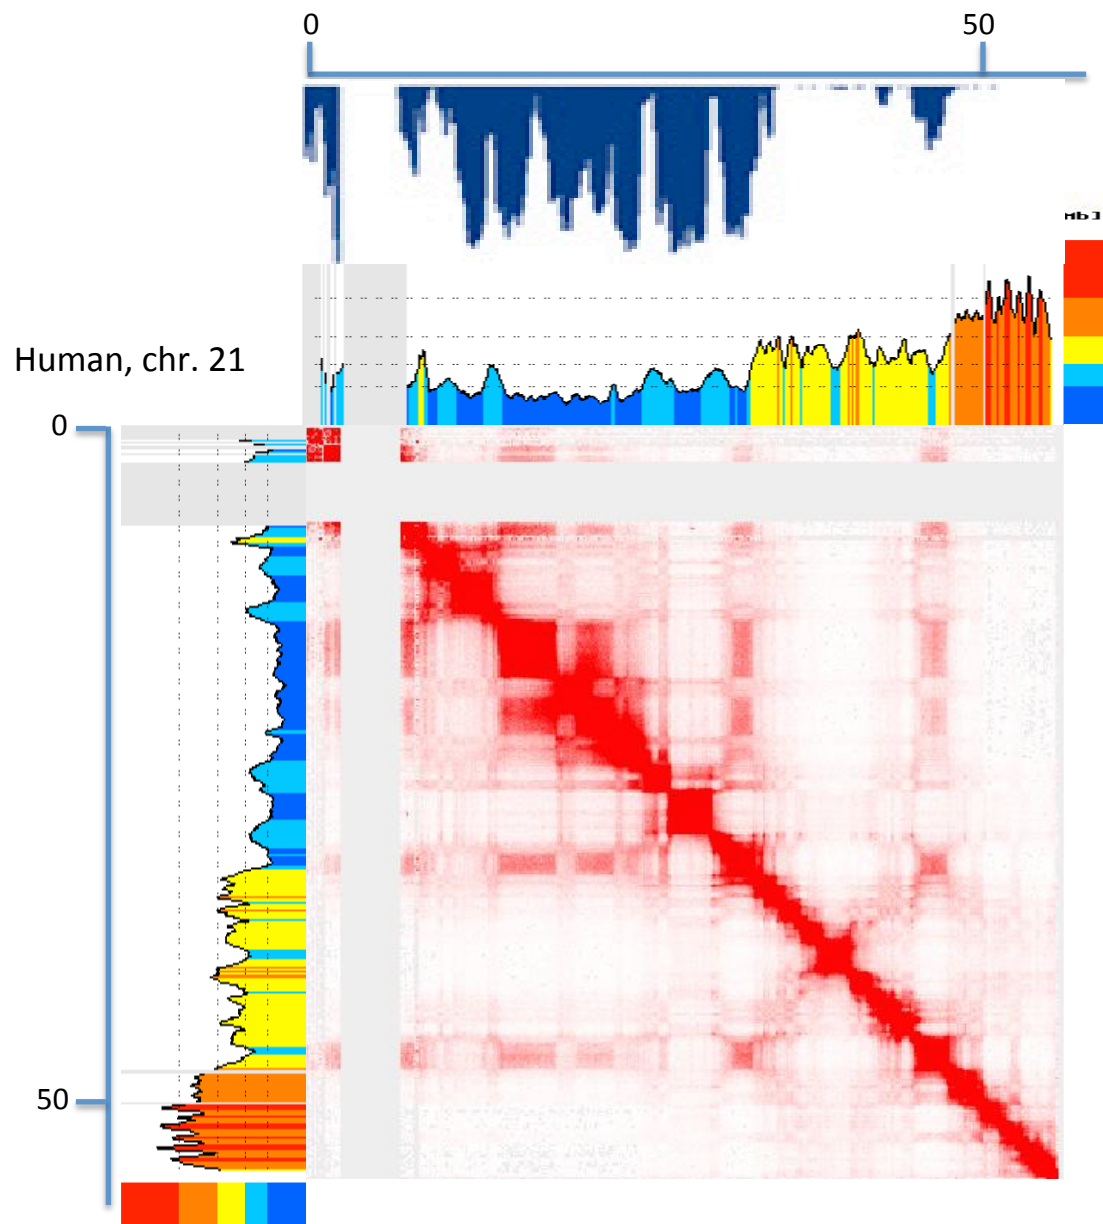

Fig. S44



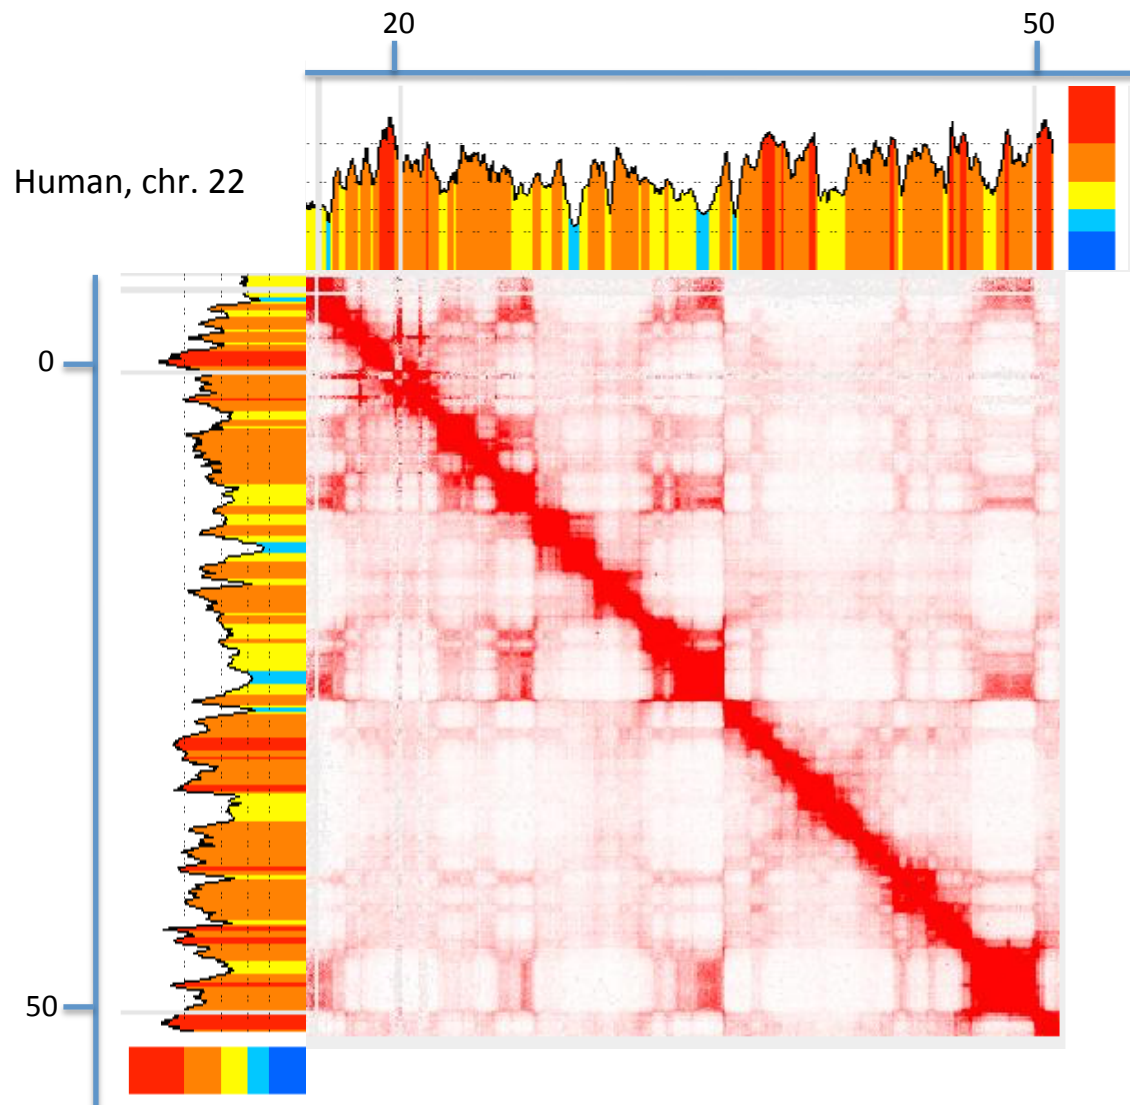

**Fig. S45**
